# Supplementary material for: Risk factors for herpes zoster infections: a systematic review and meta-analysis unveiling common trends and heterogeneity patterns
Source: PubMed Central journal article supplement (PMC11142967; doi:10.1007/s15010-023-02156-y), 2024-01-18

### S5. Forest plots for each subgroup.

#### Asthma

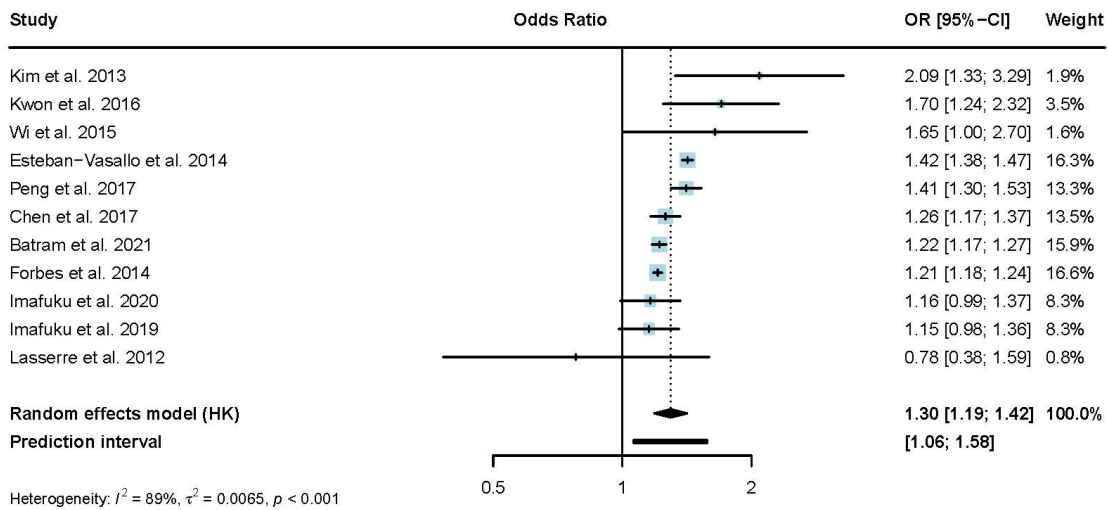

#### Cardiovascular Disorders

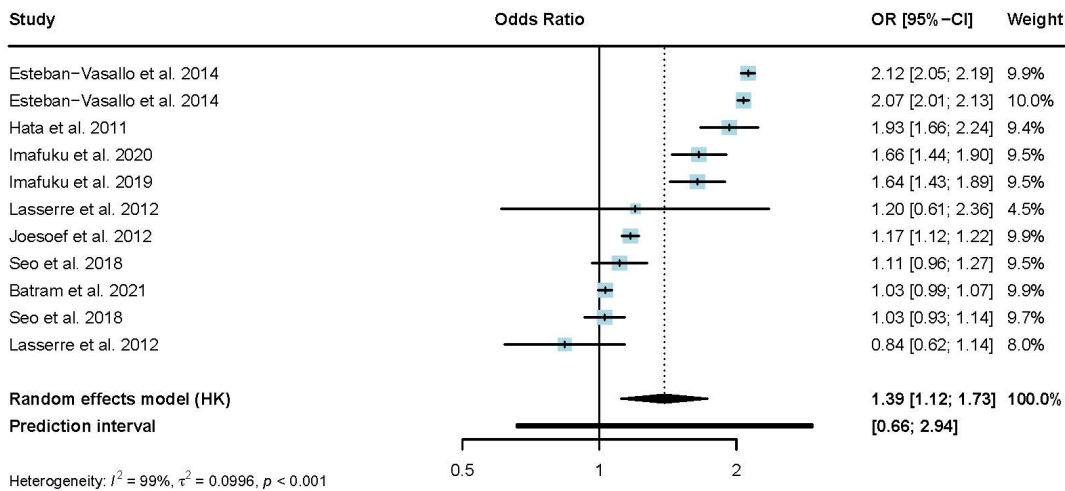

#### Chronic heart failure (CHF)

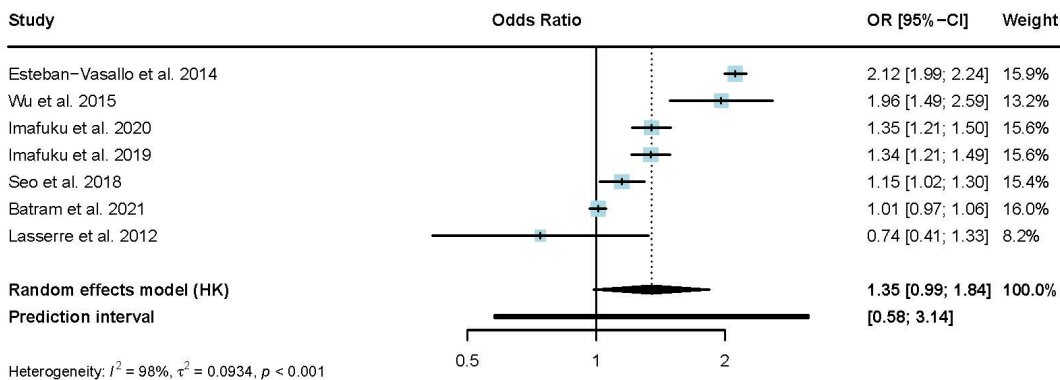

## Chronic obstructive pulmonary disorder (COPD)

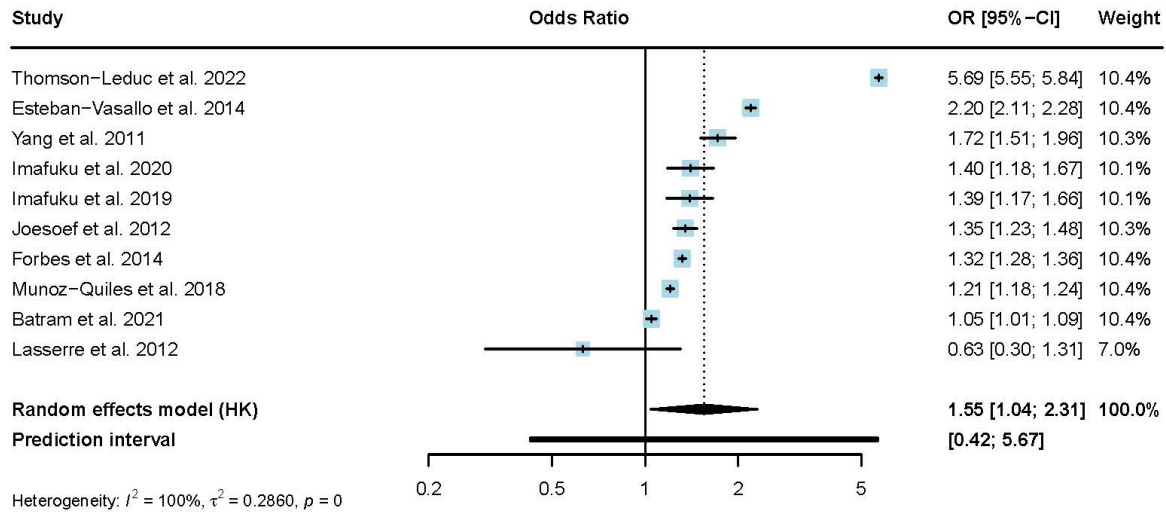

## Depression

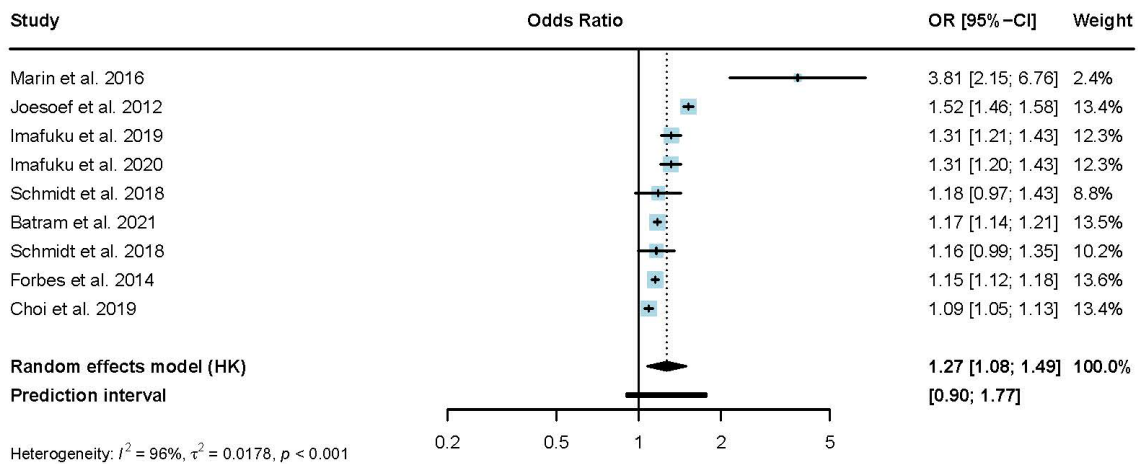

## Diabetes

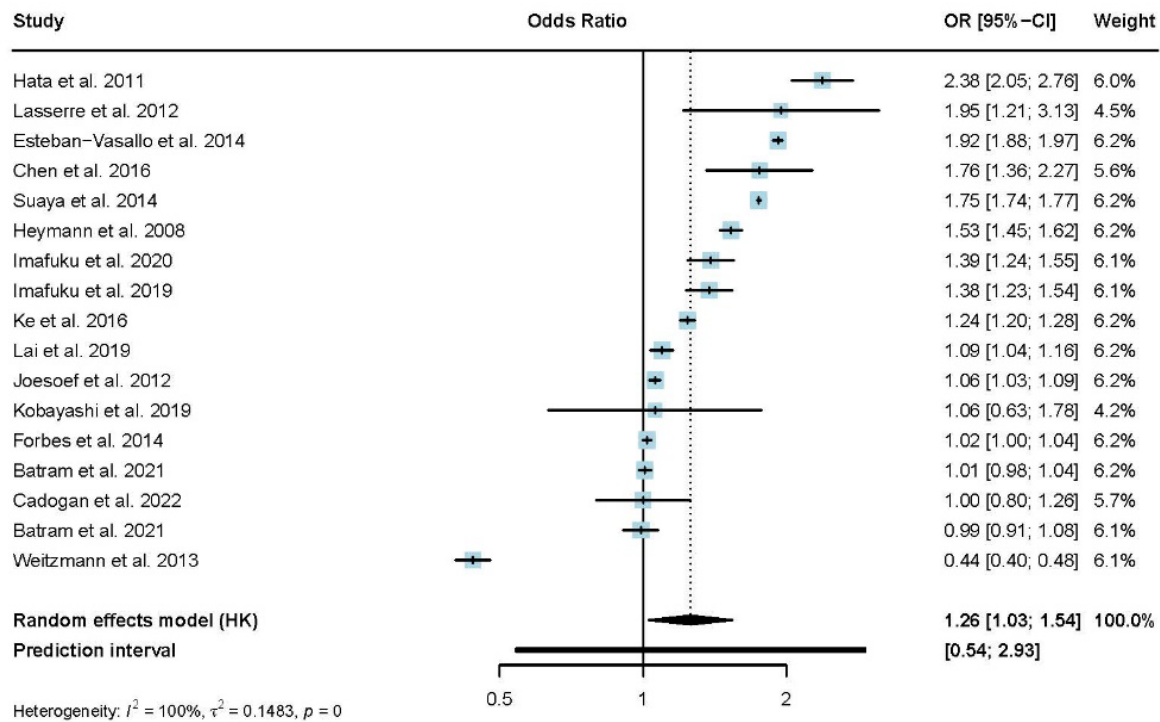

## Rheumatoid arthritis (RA)

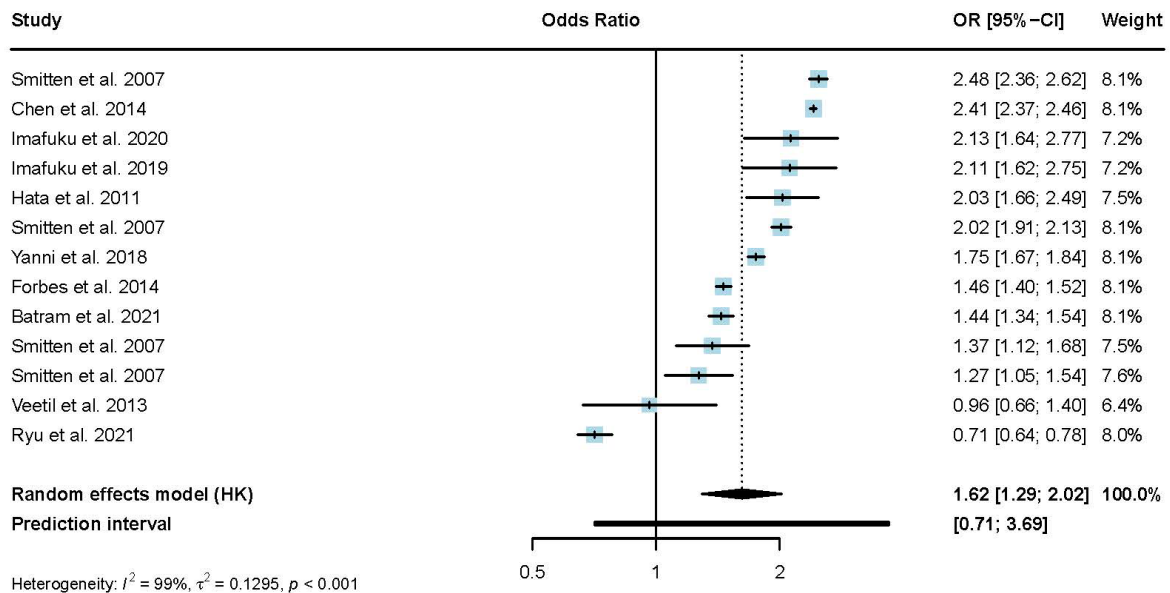

## Mental health condition

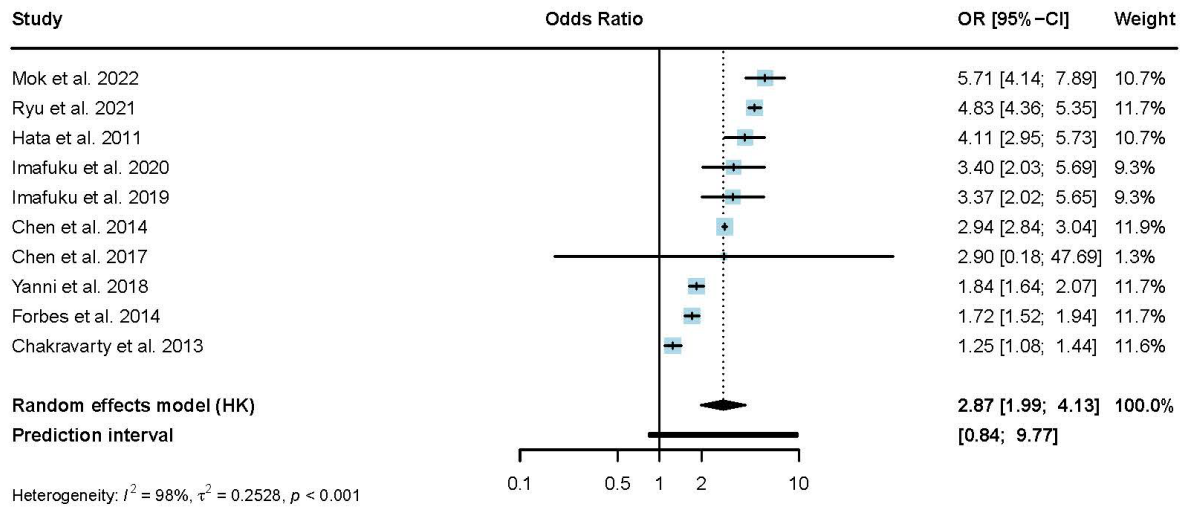

## Systemic lupus erythematosus (SLE)

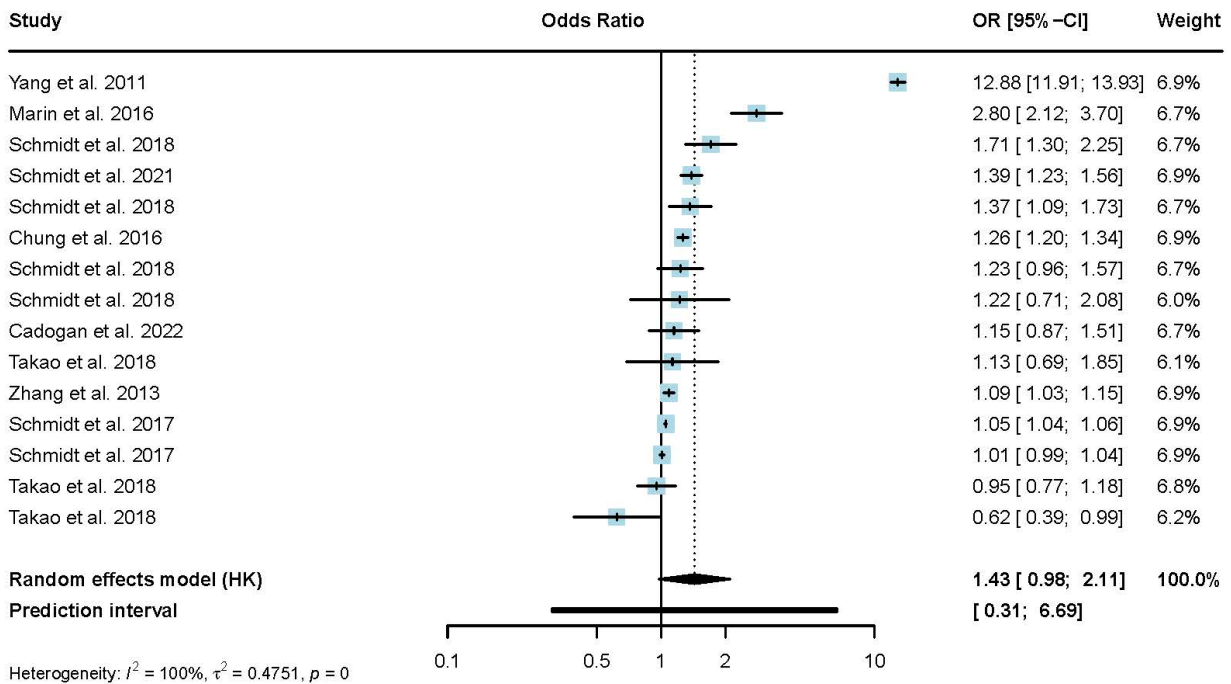

## Autoimmune disorders

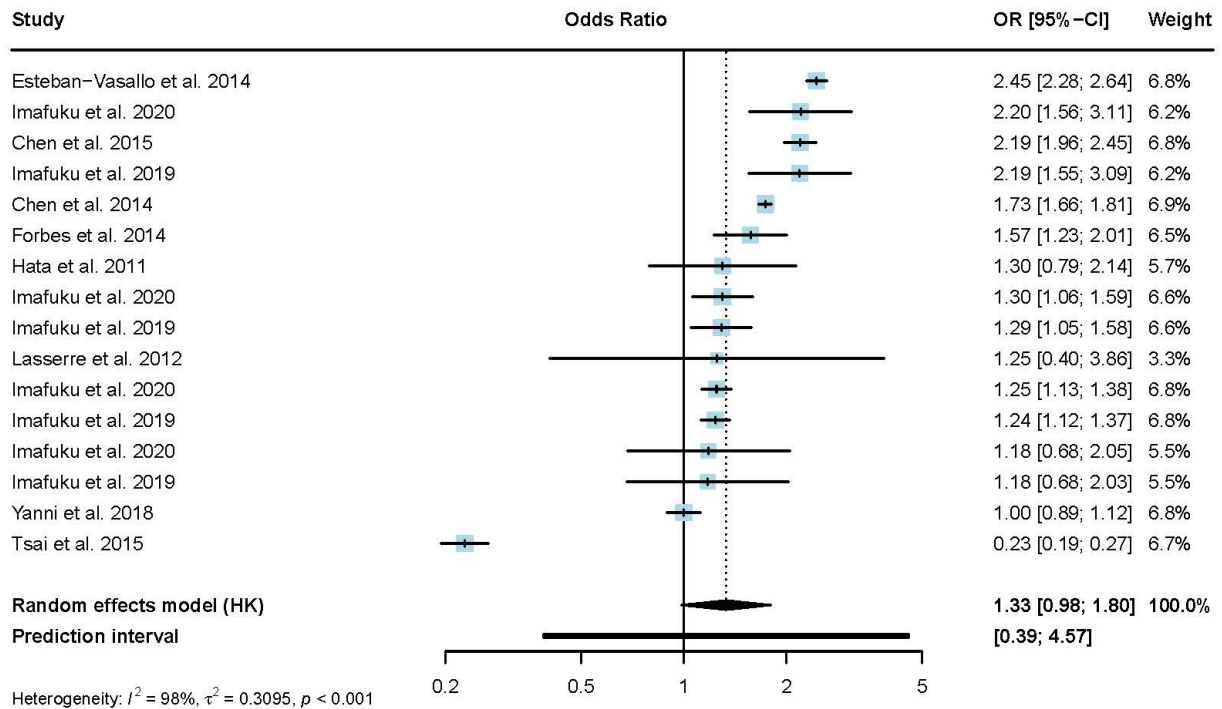

## Psoriasis

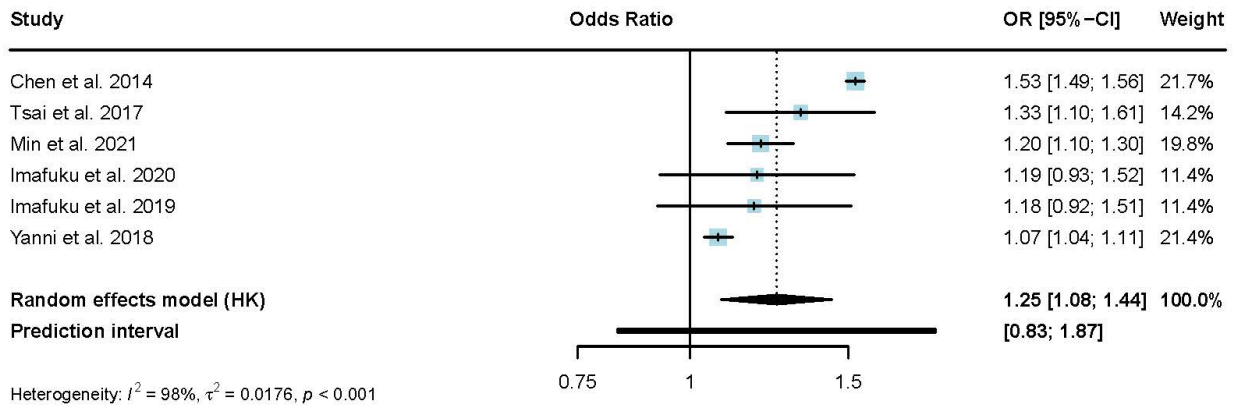

## Inflammatory bowel disease (IBD)

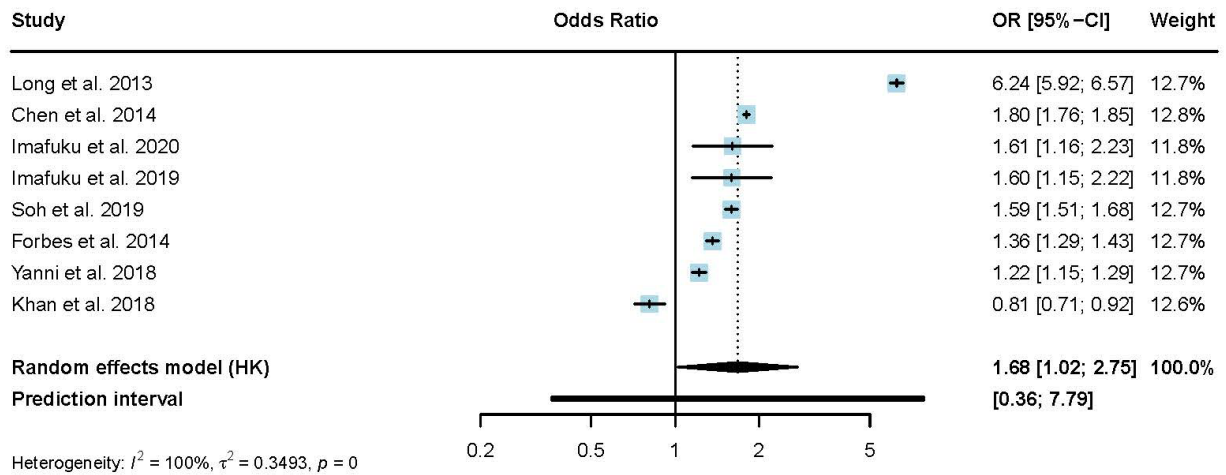

## Renal disorders

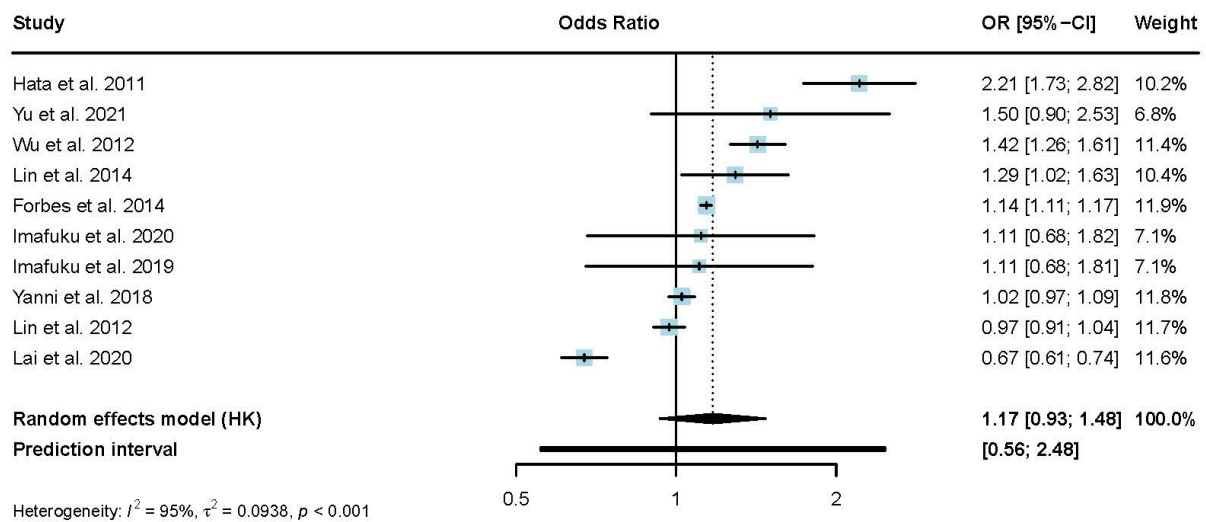

## Hematological disorders

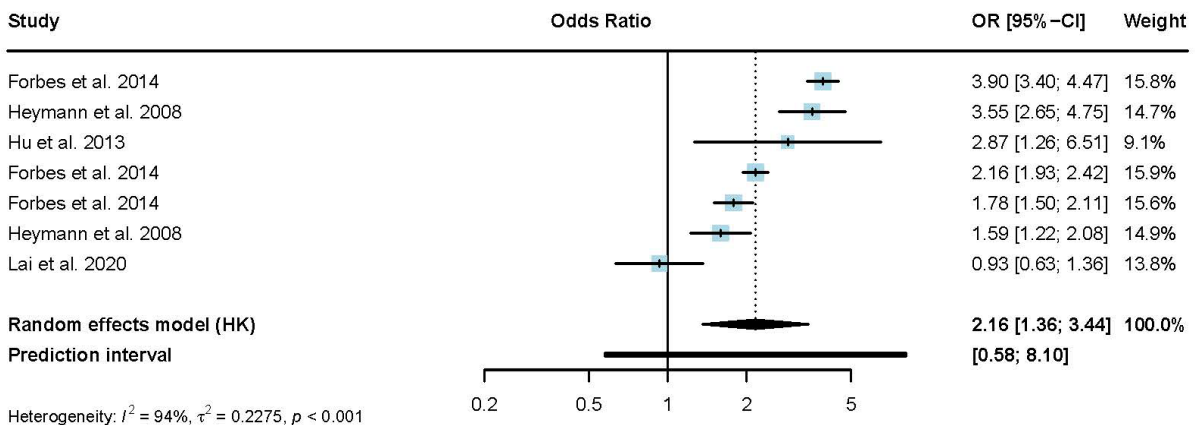

## Endocrine and metabolic disorders

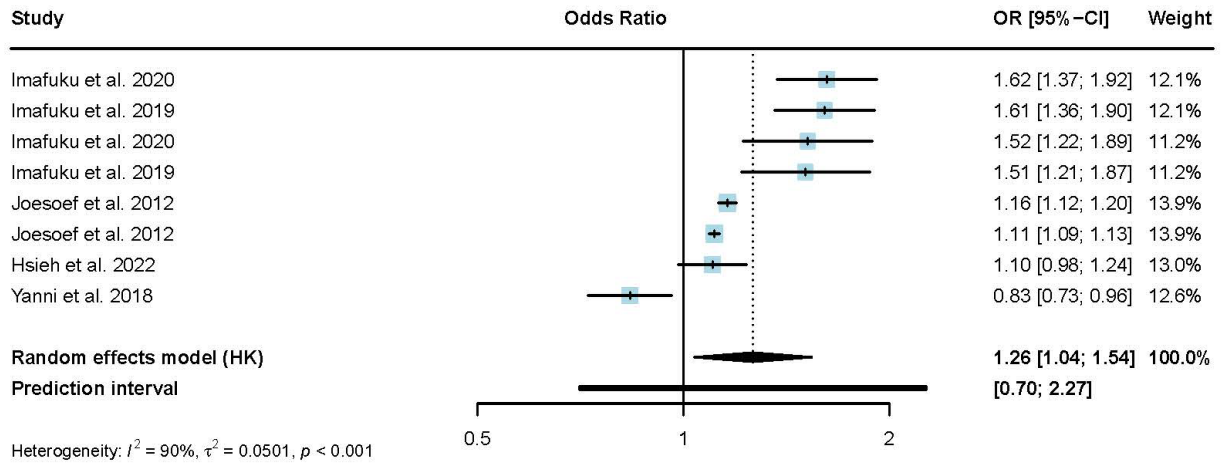

## Musculoskeletal disorders

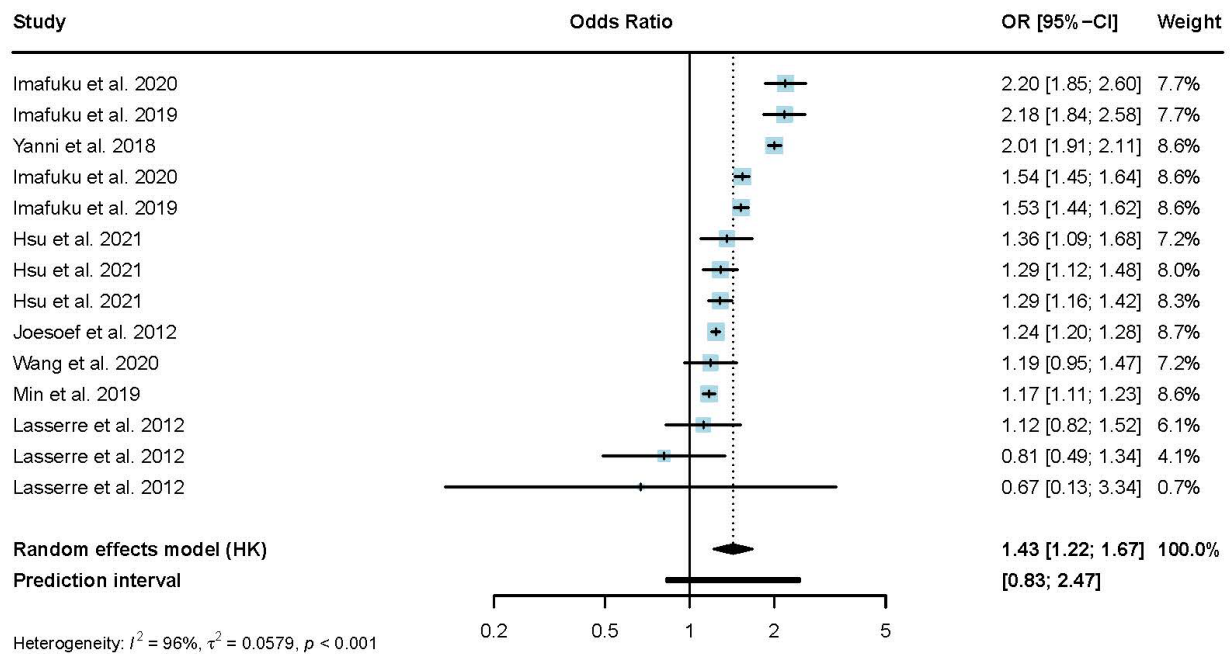

## Neurological disorders

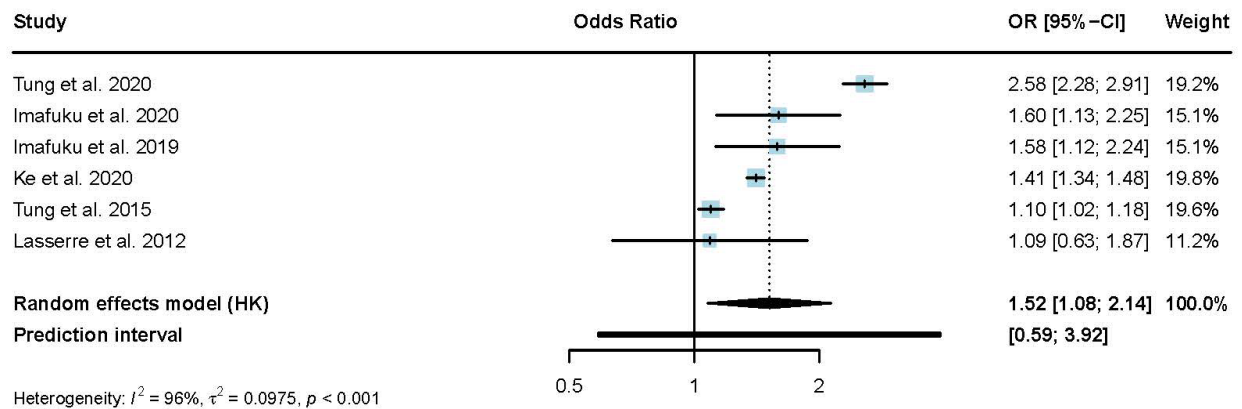

Supplement: 15010_2023_2156_MOESM5_ESM.pdf [file 15010_2023_2156_MOESM5_ESM.pdf]
