# Supplementary material for: Risk factors for herpes zoster infections: a systematic review and meta-analysis unveiling common trends and heterogeneity patterns
Source: PubMed Central journal article supplement (PMC11142967; doi:10.1007/s15010-023-02156-y), 2024-01-18

S9. Correlation Matrices for each outcome.

**Asthma**

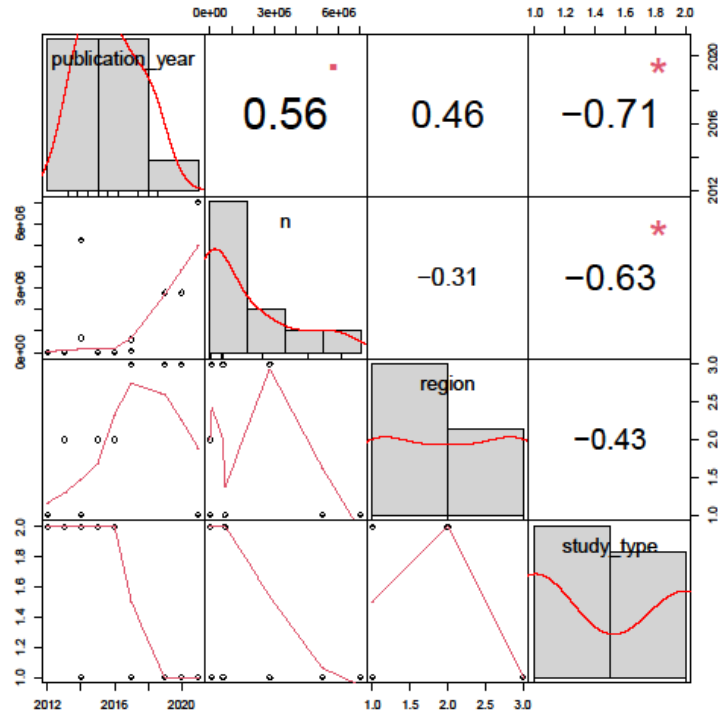

**Autoimmune disorders**

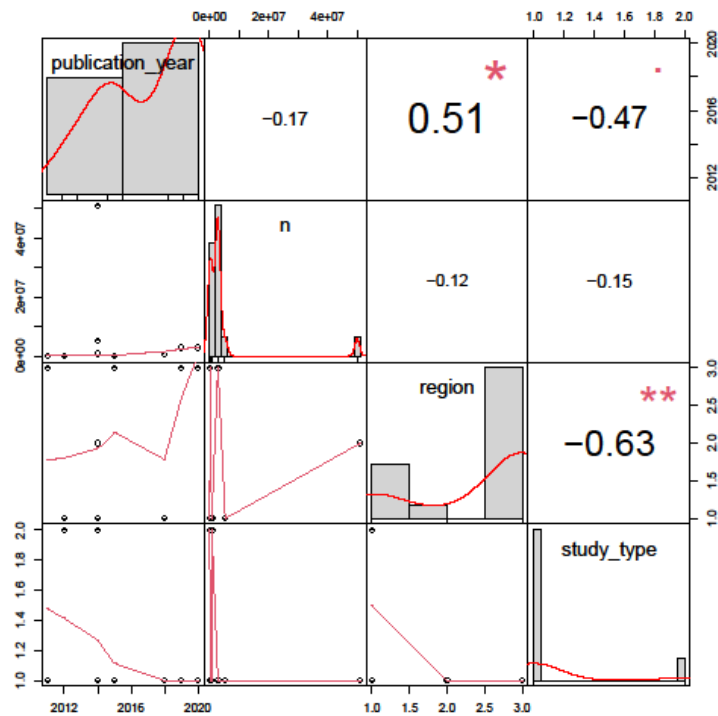

## Cancer

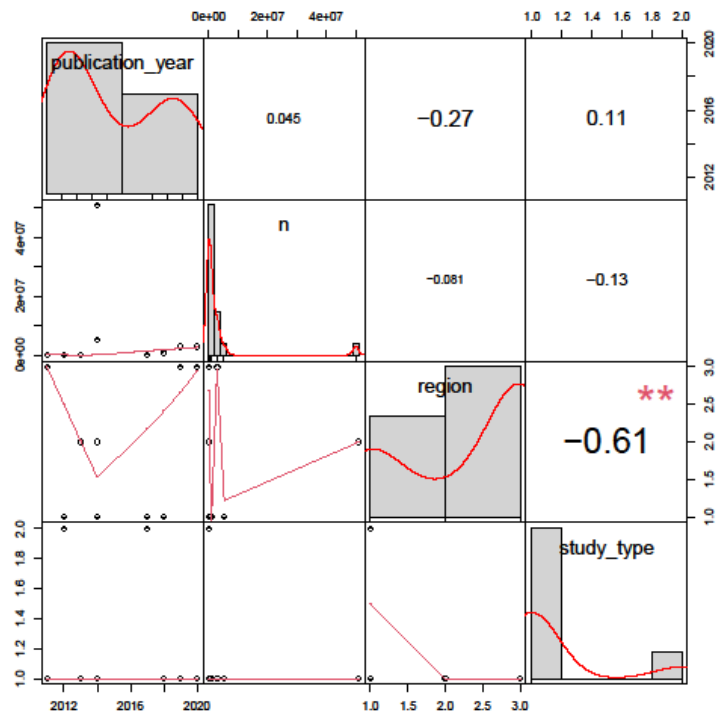

## Cardiovascular disorders

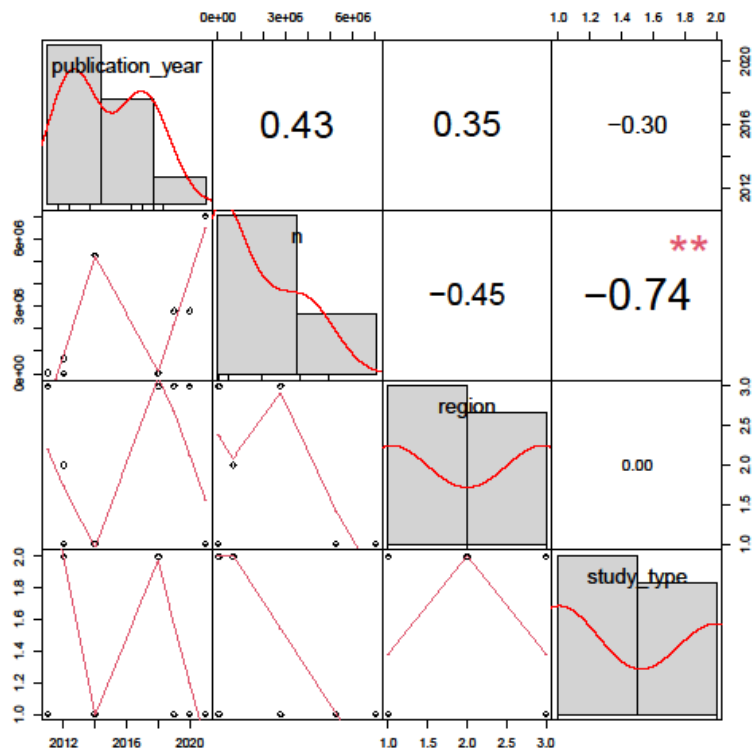

## CHF

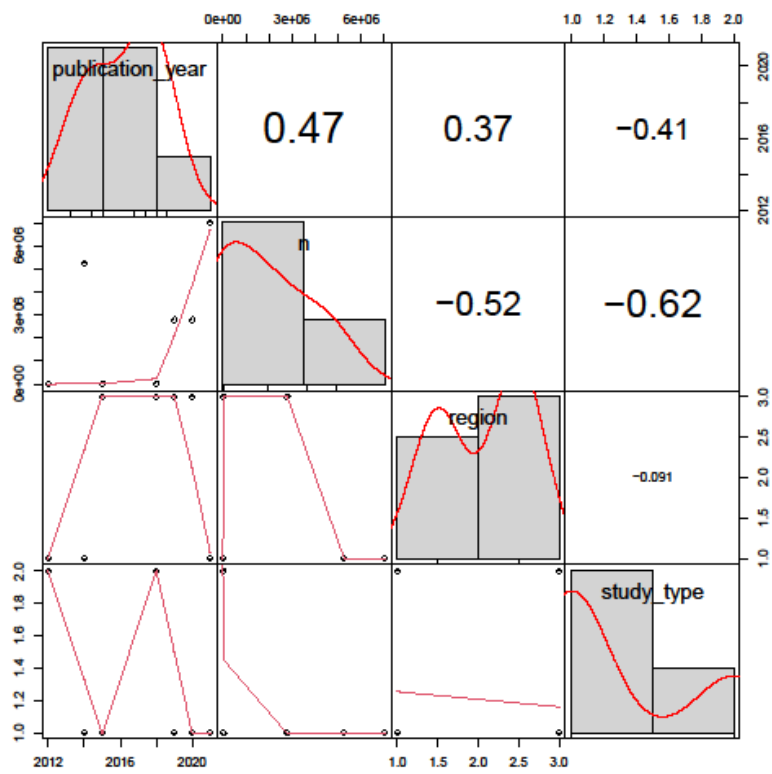

## COPD

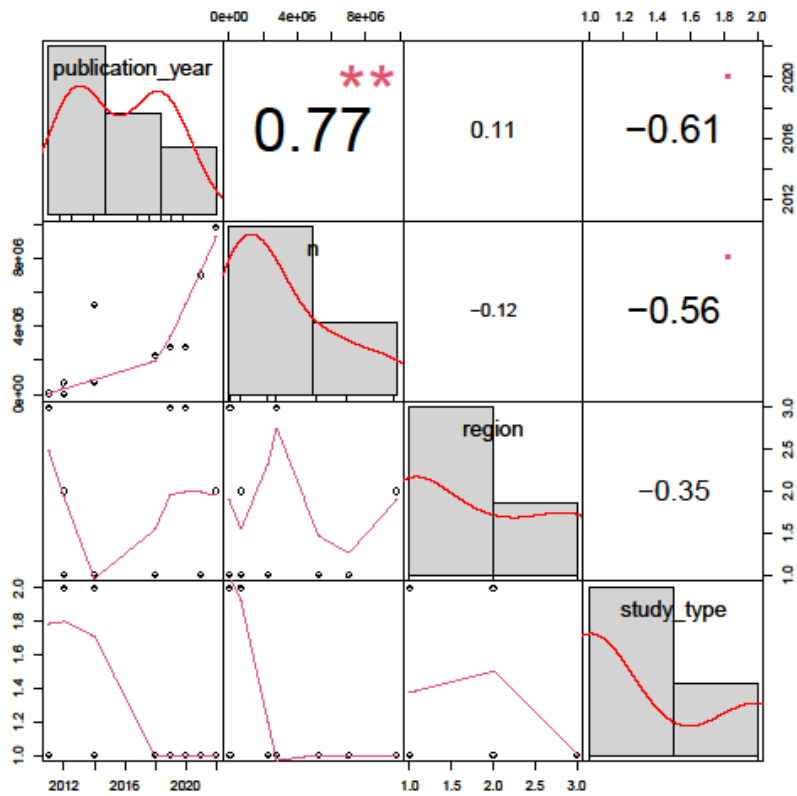

## Depression

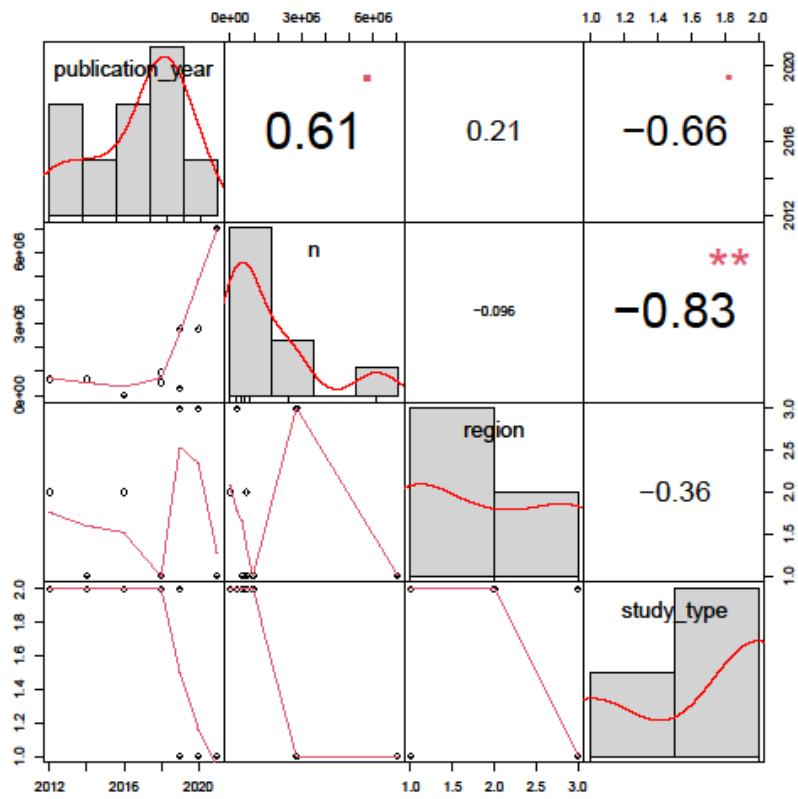

## Diabetes

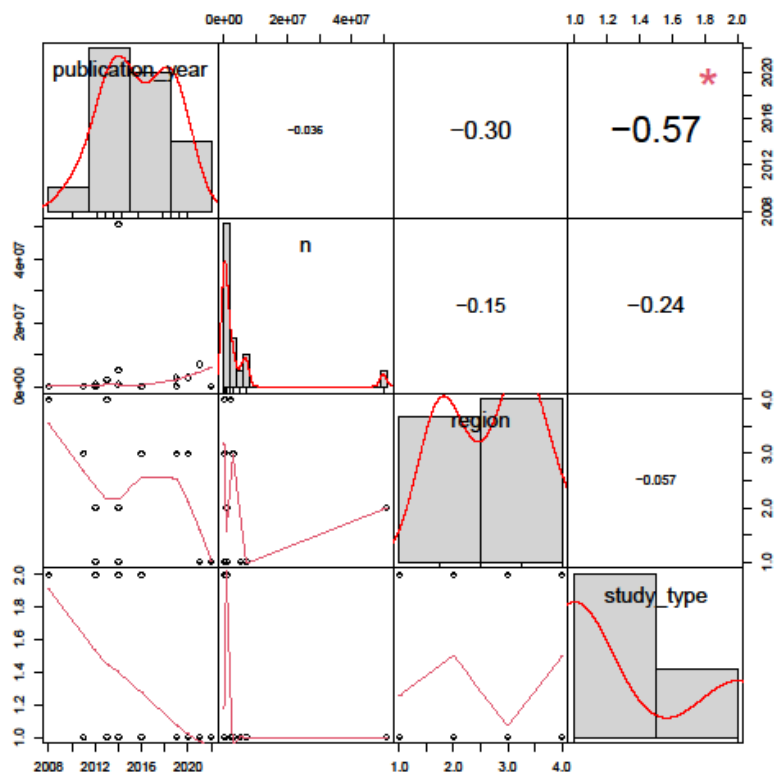

## Digestive disorders

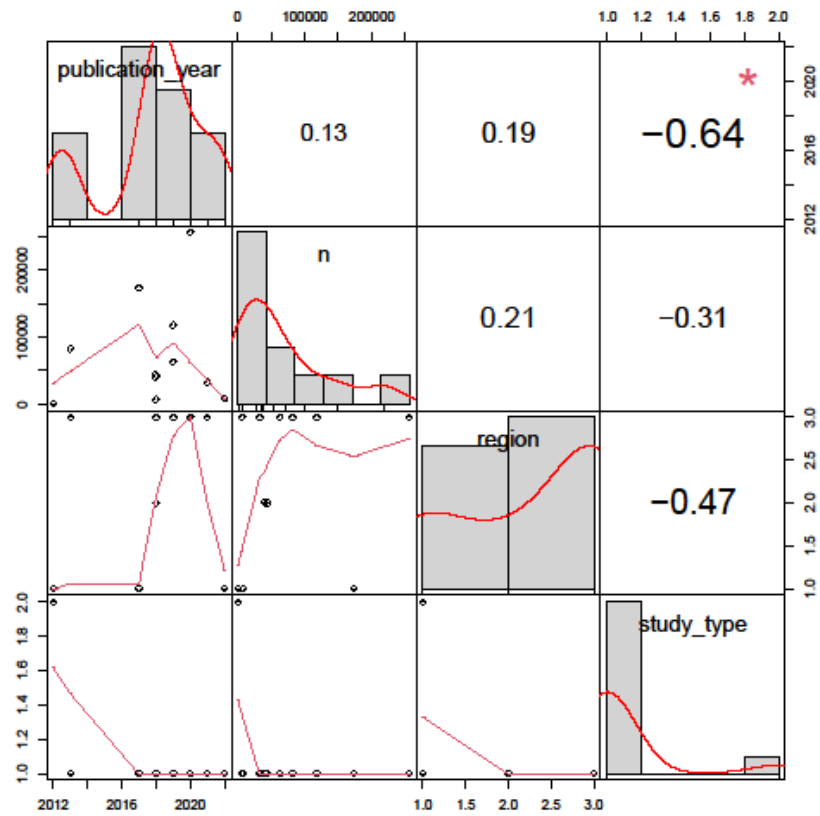

## Endocrine and metabolic disorders

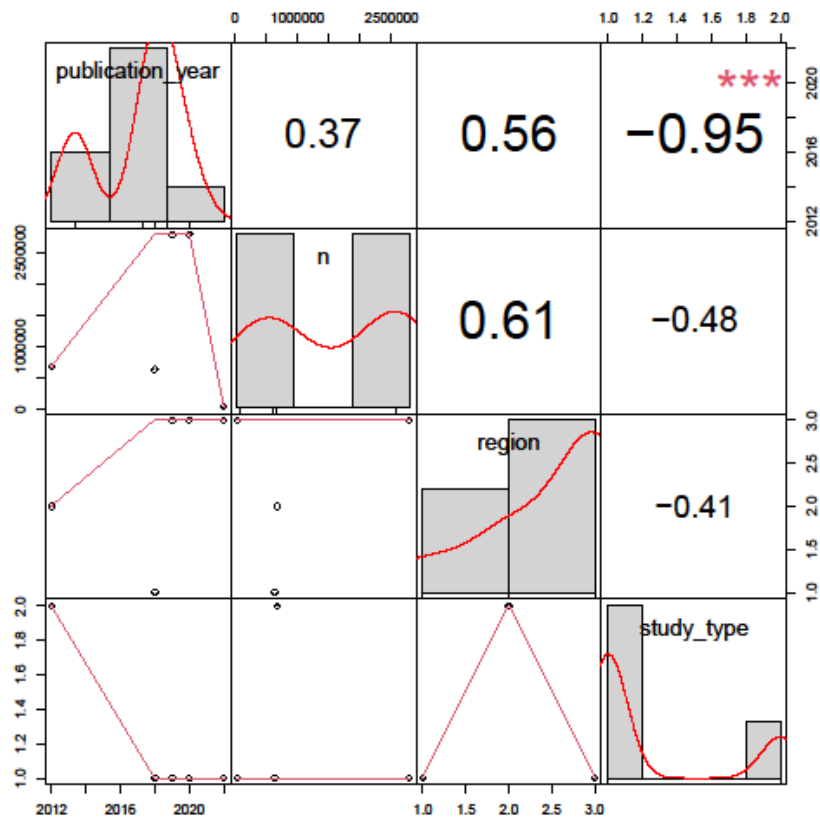

## Hematological disorders

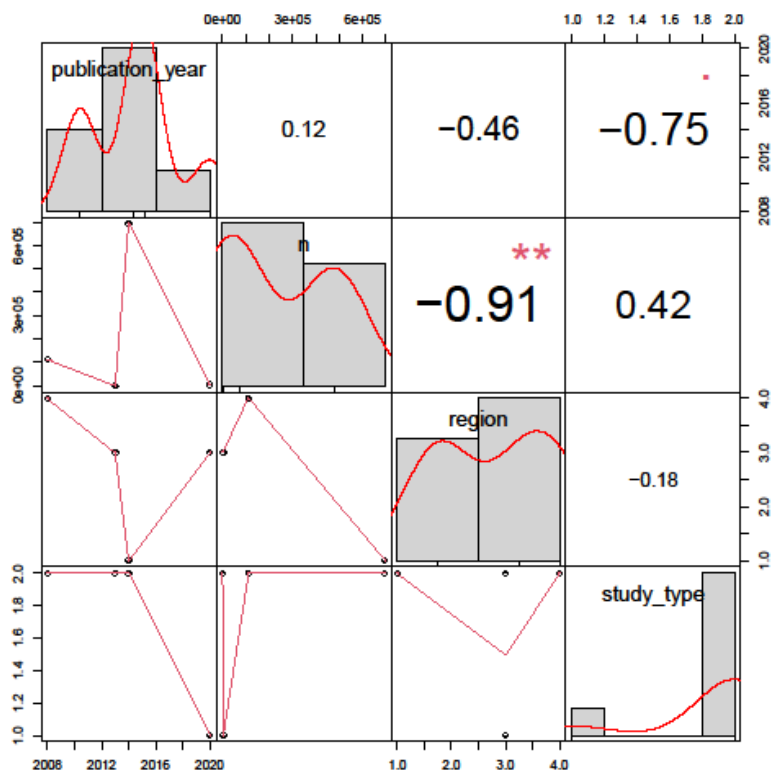

## HIV

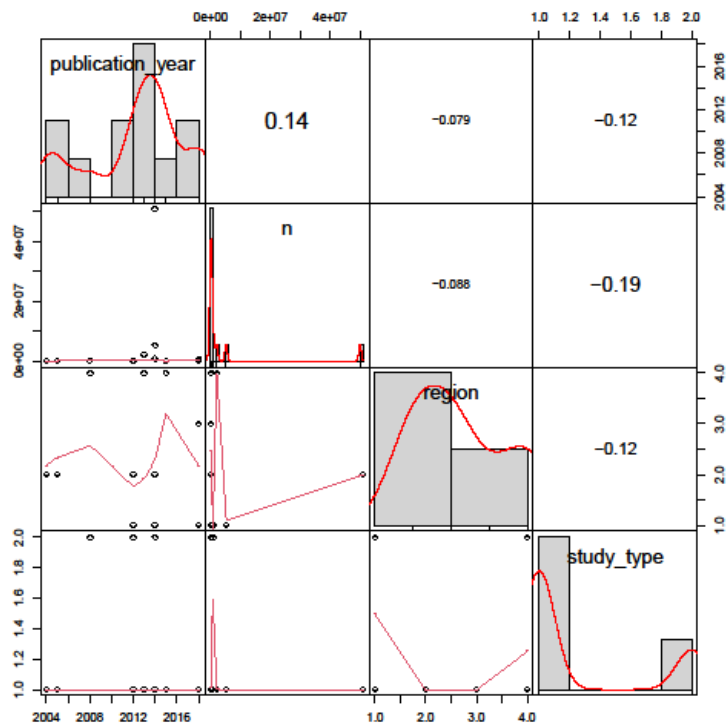

# IBD

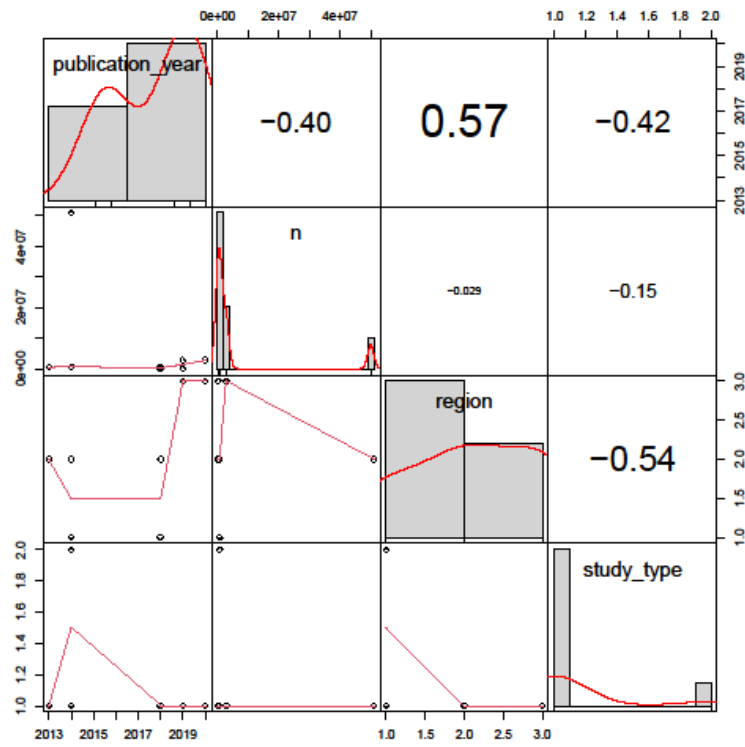

# Mental health condition

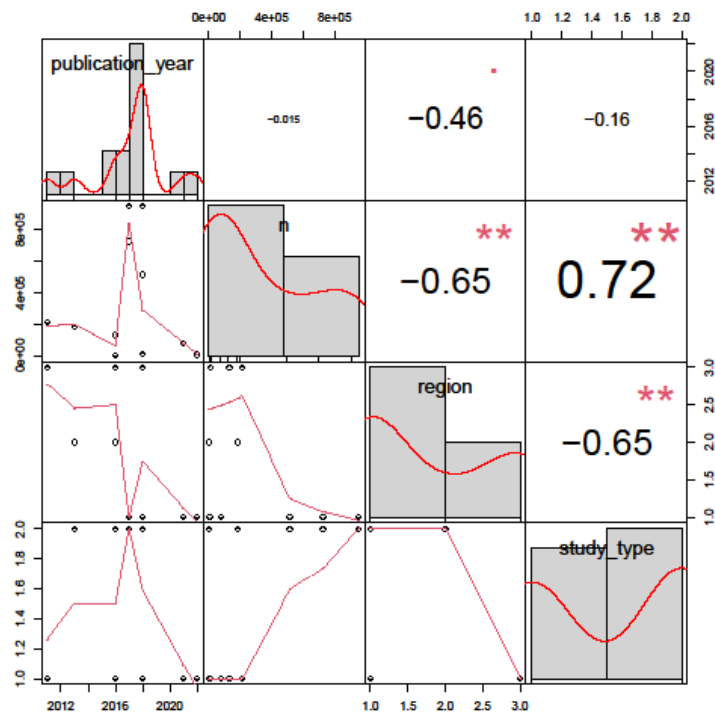

## Musculoskeletal disorders

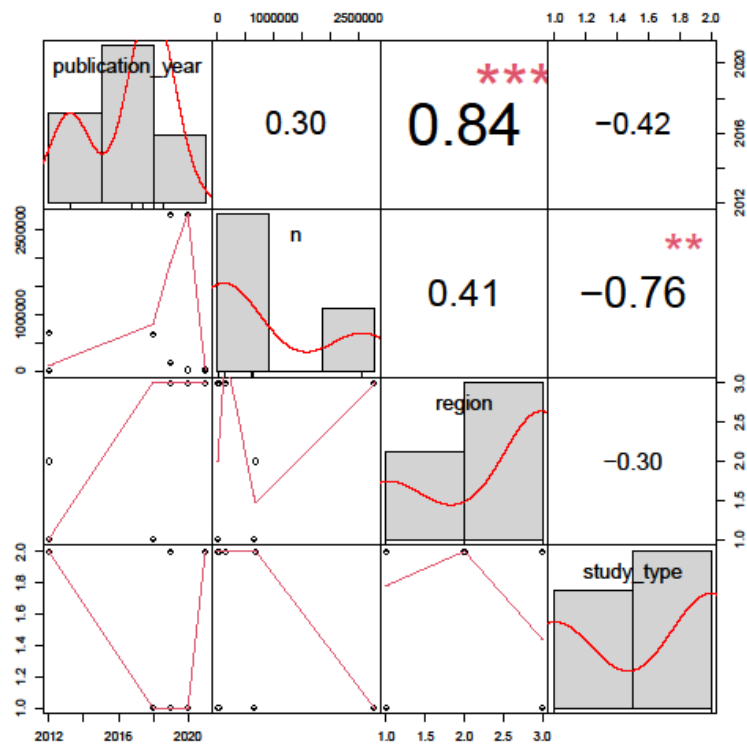

## Neurological disorders

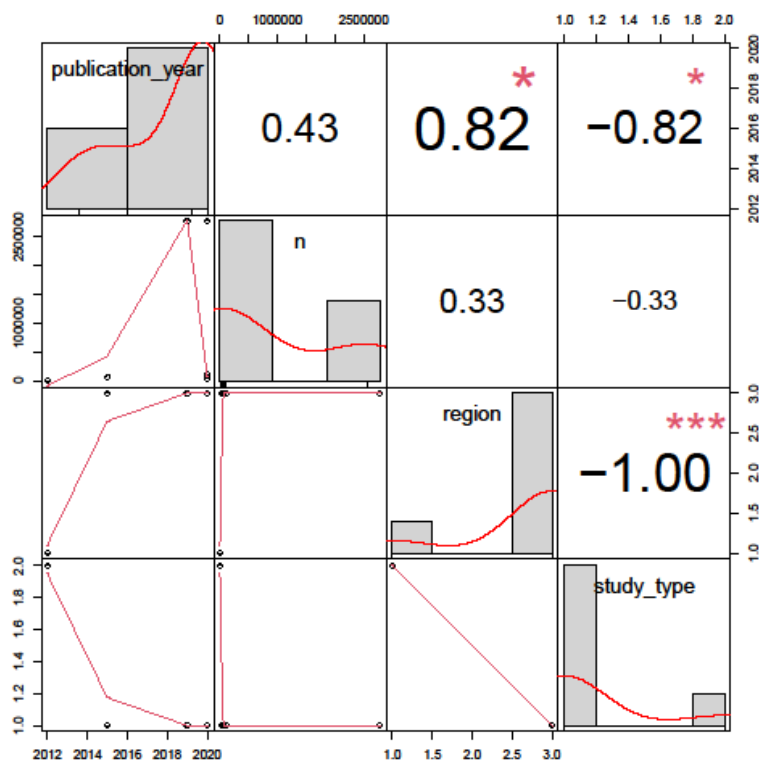



## Psoriasis

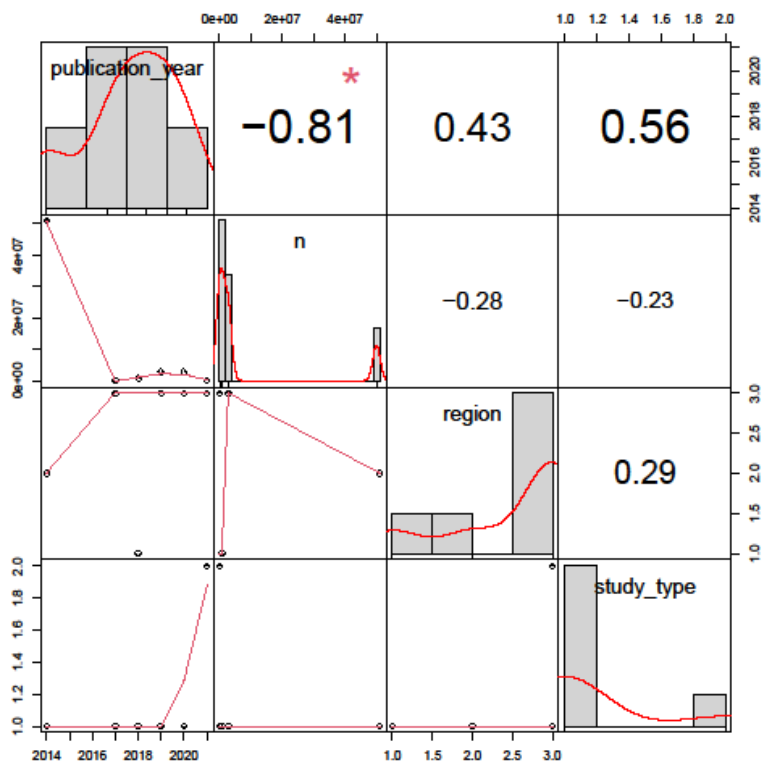

## Renal disorders

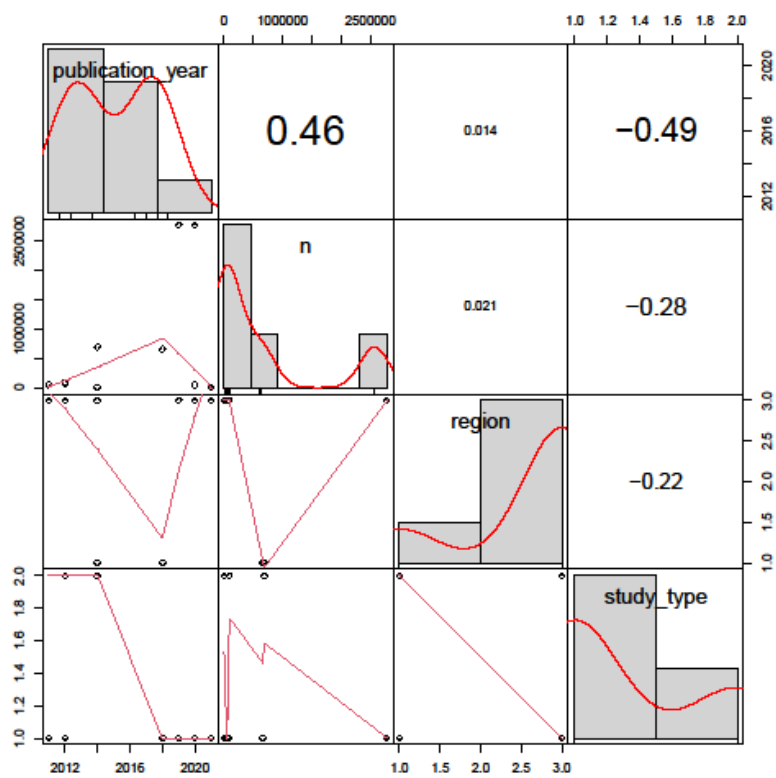

RA

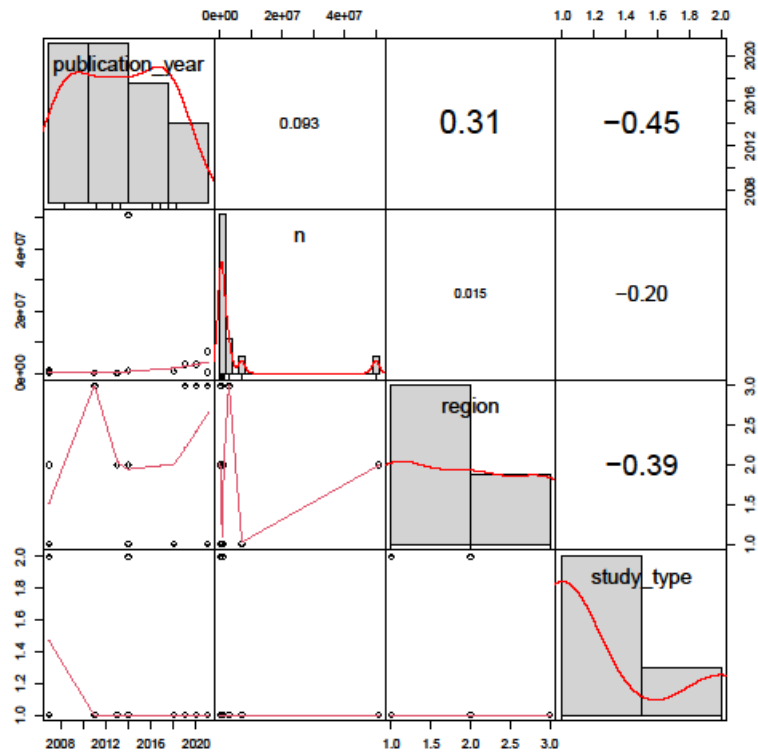

SLE

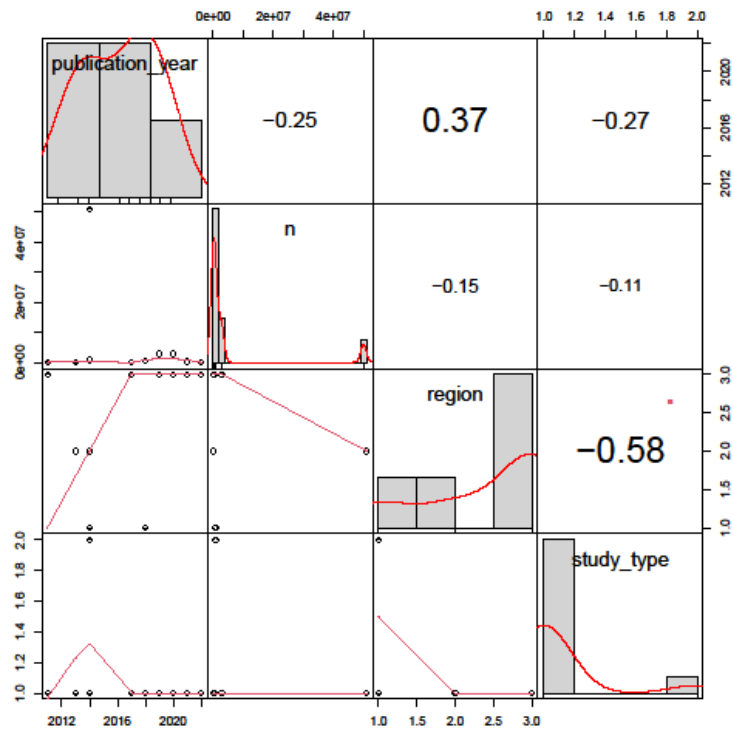

# Transplantation

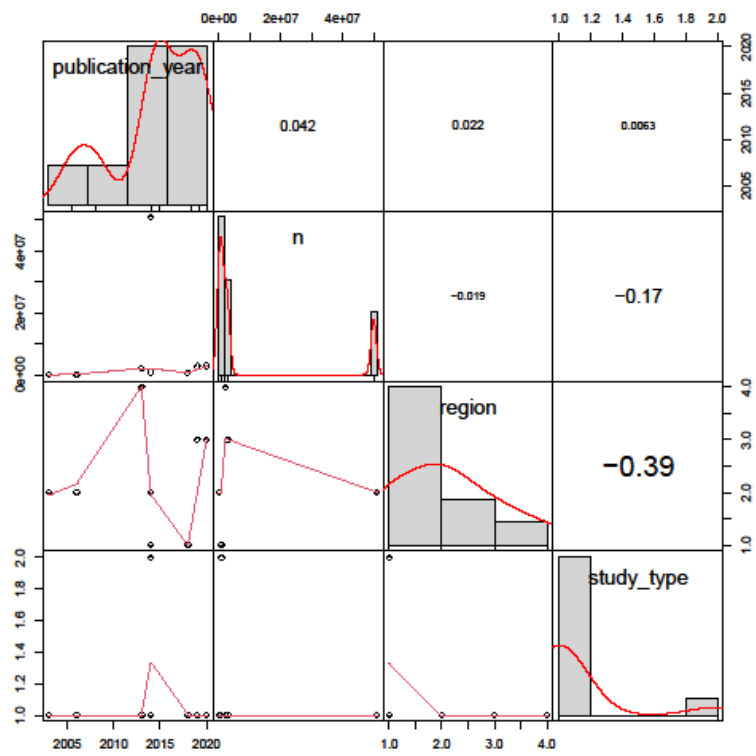

Supplement: 15010_2023_2156_MOESM9_ESM.pdf [file 15010_2023_2156_MOESM9_ESM.pdf]
