# Supplementary material for: Risk factors for herpes zoster infections: a systematic review and meta-analysis unveiling common trends and heterogeneity patterns
Source: PubMed Central journal article supplement (PMC11142967; doi:10.1007/s15010-023-02156-y), 2024-01-18
Supplement: 15010_2023_2156_MOESM3_ESM.pdf [file 15010_2023_2156_MOESM3_ESM.pdf]

### S3. Search Strategy.

Databases: PubMed, EMBASE, Web of Science; Accessed on: January 1<sup>st</sup> 2023

#### Medline via PubMed

| #         | Search Term                                             |
|-----------|---------------------------------------------------------|
| 1         | herpes zoster[MeSH Terms]                               |
| 2         | herpes zoster[Title/Abstract]                           |
| 3         | zoster[Title/Abstract]                                  |
| 4         | shingles[Title/Abstract]                                |
| <b>5</b>  | <b># 1 OR #2 OR #3 OR #4</b>                            |
| 6         | epidemiologic studies[MeSH Terms]                       |
| 7         | epidemiolog*[Title/Abstract]                            |
| 8         | risk[MeSH Terms]                                        |
| 9         | odds ratio[Title/Abstract]                              |
| 10        | odds ratio[MeSH Terms]                                  |
| 11        | morbidity[MeSH Terms]                                   |
| 12        | incidence[Title/Abstract]                               |
| 13        | prevalence[Title/Abstract]                              |
| <b>14</b> | <b>#6 OR #7 OR #8 OR #9 OR #10 OR #11 OR #12 OR #13</b> |
| 15        | risk factor* [Title/Abstract]                           |
| 16        | underlying disease*[Title/Abstract]                     |
| 17        | underlying condition*[Title/Abstract]                   |
| 18        | chronic disease*[Title/Abstract]                        |
| 19        | comorbid*[Title/Abstract]                               |
| 20        | association[Title/Abstract]                             |
| 21        | sequelae[Title/Abstract]                                |
| <b>22</b> | <b>#15 OR #16 OR #17 OR #18 OR #19 OR #20 OR #21</b>    |
| <b>23</b> | <b>#5 AND #14 AND #22</b>                               |

#### EMBASE

| #         | Search Term                                                  |
|-----------|--------------------------------------------------------------|
| 1         | 'herpes zoster'/exp                                          |
| 2         | 'herpes zoster':ab,ti                                        |
| <b>3</b>  | <b>#1 OR #2</b>                                              |
| 4         | epidemiolog*:ab,ti                                           |
| 5         | 'epidemiological data'/exp                                   |
| 6         | 'risk'/exp                                                   |
| 7         | risk:ab,ti                                                   |
| 8         | 'odds ratio'/exp                                             |
| 9         | 'odds ratio':ab,ti                                           |
| 10        | incidence:ab,ti                                              |
| 11        | prevalence:ab,ti                                             |
| 12        | comorbid*:ab,ti                                              |
| <b>13</b> | <b>#4 OR #5 OR #6 OR #7 OR #8 OR #9 OR #10 OR #11 OR #12</b> |
| 14        | 'risk factor'/exp                                            |
| 15        | 'risk factor*':ab,ti                                         |
| 16        | 'underlying disease*':ab,ti                                  |
| 17        | 'underlying condition*':ab,ti                                |
| <b>18</b> | <b>#14 OR #15 OR #16 OR #17</b>                              |
| <b>19</b> | <b>#3 AND #13 AND #18</b>                                    |

#### Web of Science

| # | Searchterm         |
|---|--------------------|
| 1 | TS=(herpes zoster) |

|           |                                                      |
|-----------|------------------------------------------------------|
| 2         | TS=(zoster)                                          |
| 3         | TS=(shingles)                                        |
| <b>4</b>  | <b>#1 OR #2 OR #3</b>                                |
| 5         | TS=(epidemiolog*)                                    |
| 6         | TS=(risk)                                            |
| 7         | TS=(odds ratio)                                      |
| 8         | TS=(prevalence)                                      |
| 9         | TS=(incidence)                                       |
| <b>10</b> | <b>#5 OR #6 OR #7 OR #8 OR #9</b>                    |
| 11        | TS=(risk factor*)                                    |
| 12        | TS=(underlying disease*)                             |
| 13        | TS=(underlying condition*)                           |
| 14        | TS=(chronic disease*)                                |
| 15        | TS=(comorbid*)                                       |
| 16        | TS=(association)                                     |
| 17        | TS=(sequelae)                                        |
| <b>18</b> | <b>#11 OR #12 OR #13 OR #14 OR #15 OR #16 OR #17</b> |
| <b>19</b> | <b>#4 AND #10 AND #18</b>                            |
