# Supplementary material for: Risk factors for herpes zoster infections: a systematic review and meta-analysis unveiling common trends and heterogeneity patterns
Source: PubMed Central journal article supplement (PMC11142967; doi:10.1007/s15010-023-02156-y), 2024-01-18
Supplement: 15010_2023_2156_MOESM4_ESM.pdf [file 15010_2023_2156_MOESM4_ESM.pdf]

#### S4. Study characteristics

| Author, Publication Year    | Country, Study period | Study Design | Data base       | Outcome definition | Study population | HZ cases total | Risk factor                  | Cumulated risk group     | Reported OR | Women (%) | Age Range (years) | Study Quality |
|-----------------------------|-----------------------|--------------|-----------------|--------------------|------------------|----------------|------------------------------|--------------------------|-------------|-----------|-------------------|---------------|
| Batram et al. 2021          | Germany (2008-2018)   | Cohort       | Claims data     | ICD-10             | 7,008,996        | -              | Asthma                       | Asthma                   | 1.22        | 62.00     | 18-100+           | 9             |
|                             |                       |              |                 |                    |                  |                | CHD                          | Cardiovascular disorders | 1.03        |           |                   |               |
|                             |                       |              |                 |                    |                  |                | CHF                          | CHF                      | 1.01        |           |                   |               |
|                             |                       |              |                 |                    |                  |                | COPD                         | COPD                     | 1.05        |           |                   |               |
|                             |                       |              |                 |                    |                  |                | Depression                   | Depression               | 1.17        |           |                   |               |
|                             |                       |              |                 |                    |                  |                | Diabetes type 1              | Diabetes                 | 1.01        |           |                   |               |
| Diabetes type 2             | Diabetes              | 0.99         |                 |                    |                  |                |                              |                          |             |           |                   |               |
| Rheumatoid arthritis        | Rheumatoid arthritis  | 1.44         |                 |                    |                  |                |                              |                          |             |           |                   |               |
| Berman et al. 2012          | USA (1995-2002)       | Cohort       | Medical records | Symptomatic        | 310              | 76             | Transplantation              | Transplantation          | -           | -         | 0-21              | 6             |
| Blank et al. 2012           | USA (2002-2009)       | Cohort       | Medical records | Symptomatic        | 4,353            | 183            | HIV                          | HIV                      | 2.46        | 35.38     | -                 | 7             |
| Cadogan et al. 2022         | UK (2015)             | Cohort       | Survey          | Self-reported      | 8,022            | 1,012          | Diabetes                     | Diabetes                 | 1.0         | 55.52     | 16-75+            | 7             |
|                             |                       |              |                 |                    |                  |                | Digestive disorder           | Digestive disorders      | 1.51        |           |                   |               |
|                             |                       |              |                 |                    |                  |                | Mental health condition      | Mental health condition  | 1.15        |           |                   |               |
| Chakravarty et al. 2013     | USA (2001-2009)       | Cohort       | Medical record  | Self-reported      | 4,260            | 1,056          | SLE                          | SLE                      | -           | 93.50     | -                 | 7             |
| Chen et al. 2017            | China (2009-2013)     | Cohort       | Medical record  | Symptomatic        | 94               | 46             | SLE                          | SLE                      | 2.9         | 90.43     | 18-75             | 8             |
| Chen et al. 2017            | Taiwan (2000-2007)    | Cohort       | Claims data     | ICD-9              | 600,891          | 2,488          | Asthma                       | Asthma                   | -           | 41.14     | 0-18              | 8             |
| Chen et al. 2016            | Taiwan (2003-2011)    | Cohort       | Claims data     | ICD-9              | 23,680           | 280            | Diabetes type 1              | Diabetes                 | -           | 53.48     | -                 | 9             |
| Chen et al. 2015            | Taiwan (2001-2008)    | Cohort       | Claims data     | ICD-9              | 30,009           | 1,808          | Primary Sjögren's syndrome   | Autoimmune disorders     | -           | 85.91     | 20-60+            | 8             |
|                             |                       |              |                 |                    |                  |                | HIV                          | HIV                      | 3.15        |           |                   |               |
|                             |                       |              |                 |                    |                  |                | Psoriasis                    | Psoriasis                | 1.53        |           |                   |               |
|                             |                       |              |                 |                    |                  |                | Multiple sclerosis           | Autoimmune disorders     | 1.73        |           |                   |               |
|                             |                       |              |                 |                    |                  |                | SLE                          | SLE                      | 2.94        |           |                   |               |
|                             |                       |              |                 |                    |                  |                | IBD                          | IBD                      | 1.80        |           |                   |               |
|                             |                       |              |                 |                    |                  |                | Bone marrow transplant       | Transplantation          | 6.05        |           |                   |               |
|                             |                       |              |                 |                    |                  |                | Solid organ transplant       | Transplantation          | 3.27        |           |                   |               |
|                             |                       |              |                 |                    |                  |                | RA                           | RA                       | 2.41        |           |                   |               |
|                             |                       |              |                 |                    |                  |                | Cancer                       | Cancer                   | 2.51        |           |                   |               |
| Chen et al. 2013            | Taiwan (2002-2008)    | Cohort       | Claims data     | ICD-9              | 82,458           | 3,187          | Peptic ulcer disease         | Digestive disorders      | -           | 46.94     | 18-65+            | 8             |
| Choi et al. 2019            | Korea (2002-2013)     | Case-control | Claims data     | ICD-10             | 291,390          | 18,656         | Depression                   | Depression               | -           | 65.70     | 20-85+            | 8             |
| Chung et al. 2016           | Taiwan (2002-2005)    | Cohort       | Claims data     | ICD-10             | 131,001          | 5,001          | Sleep disorder               | Mental health condition  | -           | 61.31     | 20+               | 7             |
| Esteban-Vasallo et al. 2014 | Spain (2009-2012)     | Cohort       | Claims data     | -                  | 5,244,402        | 81,541         | Asthma                       | Asthma                   | 1.42        | -         | 18-75+            | 7             |
|                             |                       |              |                 |                    |                  |                | COPD                         | COPD                     | 2.20        |           |                   |               |
|                             |                       |              |                 |                    |                  |                | Ischemic heart disease       | Cardiovascular disorders | 2.12        |           |                   |               |
|                             |                       |              |                 |                    |                  |                | Heart failure                | CHF                      | 2.12        |           |                   |               |
|                             |                       |              |                 |                    |                  |                | Other cardiovascular disease | Cardiovascular disorders | 2.07        |           |                   |               |
|                             |                       |              |                 |                    |                  |                | Diabetes                     | Diabetes                 | 1.92        |           |                   |               |
| HIV                         | HIV                   | 2.47         |                 |                    |                  |                |                              |                          |             |           |                   |               |

|                          |                    |              |                 |               |         |         |                                          |                                   |       |        |        |   |
|--------------------------|--------------------|--------------|-----------------|---------------|---------|---------|------------------------------------------|-----------------------------------|-------|--------|--------|---|
|                          |                    |              |                 |               |         |         | Other immunodeficiency                   | Autoimmune disorders              | 2.45  |        |        |   |
|                          |                    |              |                 |               |         |         | Cancer                                   | Cancer                            | 1.95  |        |        |   |
|                          |                    |              |                 |               |         |         | RA                                       | RA                                | 1.46  |        |        |   |
|                          |                    |              |                 |               |         |         | SLE                                      | SLE                               | 1.72  |        |        |   |
|                          |                    |              |                 |               |         |         | IBD                                      | IBD                               | 1.36  |        |        |   |
|                          |                    |              |                 |               |         |         | COPD                                     | COPD                              | 1.32  |        |        |   |
|                          |                    |              |                 |               |         |         | Asthma                                   | Asthma                            | 1.21  |        |        |   |
|                          |                    |              |                 |               |         |         | Chronic kidney disease                   | Renal disorders                   | 1.14  |        |        |   |
|                          |                    |              |                 |               |         |         | Depression                               | Depression                        | 1.15  |        |        |   |
| Forbes et al. 2014       | UK (2000-2011)     | Case-control | Data linkage    | ICD-10        | 694,295 | 144,959 | Diabetes                                 | Diabetes                          | 1.02  | 60.68  | 18-90+ | 8 |
|                          |                    |              |                 |               |         |         | HIV                                      | HIV                               | 5.07  |        |        |   |
|                          |                    |              |                 |               |         |         | Leukaemia                                | Hematological disorders           | 1.78  |        |        |   |
|                          |                    |              |                 |               |         |         | Lymphoma                                 | Hematological disorders           | 3.90  |        |        |   |
|                          |                    |              |                 |               |         |         | Myeloma                                  | Hematological disorders           | 2.16  |        |        |   |
|                          |                    |              |                 |               |         |         | Haematopoietic stem cell transplantation | Transplantation                   | 13.46 |        |        |   |
|                          |                    |              |                 |               |         |         | Other immunodeficiency                   | Autoimmune disorders              | 1.57  |        |        |   |
| Gebo et al. 2005         | USA (1997-2001)    | Cohort       | Medical records | Symptomatic   | 2,543   | 158     | HIV                                      | HIV                               | 1.67  | 37.00  | 23-58  | 7 |
| Glesby et al. 2004       | USA (1994-1995)    | Cohort       | Medical records | Self-reported | 2,321   | 337     | HIV                                      | HIV                               | 0.9   | 100.00 | 34-45  | 8 |
| Gourishankar et al. 2003 | Canada (1994-1999) | Cohort       | Medical records | Symptomatic   | 869     | 75      | Organ transplant                         | Transplantation                   | -     | 35.40  | 16-74  | 7 |
| Hansson et al. 2017      | UK (2000-2015)     | Case-control | Data linkage    | ICD-10        | 64,833  | 16,129  | Any solid malignancy                     | Cancer                            | 1.19  | 60.56  | 18-90+ | 7 |
|                          |                    |              |                 |               |         |         | Any haematological malignancy            | Cancer                            | 2.42  |        |        |   |
|                          |                    |              |                 |               |         |         | Brain tumor                              | Cancer                            | 3.69  |        |        |   |
|                          |                    |              |                 |               |         |         | Lung cancer                              | Cancer                            | 2.17  |        |        |   |
|                          |                    |              |                 |               |         |         | Breast cancer                            | Cancer                            | 2.34  |        |        |   |
|                          |                    |              |                 |               |         |         | Esophageal cancer                        | Cancer                            | 4.05  |        |        |   |
|                          |                    |              |                 |               |         |         | Gastric cancer                           | Cancer                            | 1.92  |        |        |   |
|                          |                    |              |                 |               |         |         | Colorectal cancer                        | Cancer                            | 1.82  |        |        |   |
|                          |                    |              |                 |               |         |         | Gynecologic cancer                       | Cancer                            | 3.34  |        |        |   |
| Hata et al. 2011         | Japan (2001-2007)  | Cohort       | Medical records | ICD-10        | 55,492  | 759     | Malignant lymphoma                       | Cancer                            | 8.39  | 53.16  | 20-103 | 7 |
|                          |                    |              |                 |               |         |         | SLE                                      | SLE                               | 4.11  |        |        |   |
|                          |                    |              |                 |               |         |         | RA                                       | RA                                | 2.03  |        |        |   |
|                          |                    |              |                 |               |         |         | Sjögrens disease                         | Autoimmune disorders              | 1.30  |        |        |   |
|                          |                    |              |                 |               |         |         | Diabetes                                 | Diabetes                          | 2.38  |        |        |   |
|                          |                    |              |                 |               |         |         | Hypertension                             | Cardiovascular disorders          | 1.93  |        |        |   |
|                          |                    |              |                 |               |         |         | Renal failure                            | Renal disorders                   | 2.21  |        |        |   |
|                          |                    |              |                 |               |         |         | Diabetes                                 | Diabetes                          | 1.53  |        |        |   |
| Heymann et al. 2008      | Israel (2002-2006) | Case-control | Claims data     | ICD-9         | 111,145 | 22,250  | HIV/AIDS                                 | HIV                               | 1.16  | 55.57  | 25-75+ | 8 |
|                          |                    |              |                 |               |         |         | Leukaemia                                | Hematological disorders           | 3.55  |        |        |   |
|                          |                    |              |                 |               |         |         | Lymphoma                                 | Hematological disorders           | 1.59  |        |        |   |
| Hsieh et al. 2022        | Taiwan (2000-2017) | Cohort       | Claims data     | ICD-9         | 40,284  | 1,207   | Polycystic ovary syndrome                | Endocrine and metabolic disorders | -     | 100.00 | 20-65+ | 8 |
| Hsu et al. 2021          | Taiwan (2000-2012) | Case-control | Claims data     | ICD-9         | 30,502  | 1,631   | Lateral epicondylitis                    | Musculoskeletal disorders         | -     | 61.30  | 20-65+ | 7 |
| Hsu et al. 2021          | Taiwan (2000-2012) | Case-control | Claims data     | ICD-9         | 8,390   | 360     | de Quervain syndrome                     | Musculoskeletal disorders         | -     | 76.97  | 20-65+ | 7 |

|                     |                                   |              |                 |        |           |        |                                    |                                   |       |       |        |   |
|---------------------|-----------------------------------|--------------|-----------------|--------|-----------|--------|------------------------------------|-----------------------------------|-------|-------|--------|---|
| Hsu et al. 2021     | Taiwan (2000-2012)                | Case-control | Claims data     | ICD-9  | 23,645    | 1,099  | Plantar facial fibromatosis        | Musculoskeletal disorders         | -     | 63.22 | 20-65+ | 7 |
| Hu et al. 2013      | Taiwan (1999-2008)                | Case-control | Medical records | ICD-9  | 130       | 65     | Lymphoma                           | Hematological disorders           | 2.87  | -     | -      | 8 |
| Imafuku et al. 2019 | Japan (2005-2014)                 | Cohort       | Claims data     | ICD-10 | 2,778,476 | 27,995 | Autoimmune thyroiditis             | Endocrine and metabolic disorders | 1.51  | 45.24 | 18-65+ | 8 |
|                     |                                   |              |                 |        |           |        | Congenital immune deficiency       | Autoimmune disorders              | 1.29  |       |        |   |
|                     |                                   |              |                 |        |           |        | Hematological malignancies         | Cancer                            | 5.08  |       |        |   |
|                     |                                   |              |                 |        |           |        | Hematopoietic stem cell transplant | Transplantation                   | 19.77 |       |        |   |
|                     |                                   |              |                 |        |           |        | IBD                                | IBD                               | 1.60  |       |        |   |
|                     |                                   |              |                 |        |           |        | Psoriasis                          | Psoriasis                         | 1.18  |       |        |   |
|                     |                                   |              |                 |        |           |        | RA                                 | RA                                | 2.11  |       |        |   |
|                     |                                   |              |                 |        |           |        | SLE                                | SLE                               | 3.37  |       |        |   |
|                     |                                   |              |                 |        |           |        | Solid organ malignancies           | Cancer                            | 1.64  |       |        |   |
|                     |                                   |              |                 |        |           |        | Vasculitis                         | Autoimmune disorders              | 1.18  |       |        |   |
|                     |                                   |              |                 |        |           |        | Other autoimmune disease           | Autoimmune disorders              | 2.19  |       |        |   |
|                     |                                   |              |                 |        |           |        | Asthma                             | Asthma                            | 1.15  |       |        |   |
|                     |                                   |              |                 |        |           |        | Chronic hepatitis                  | Autoimmune disorders              | 1.24  |       |        |   |
|                     |                                   |              |                 |        |           |        | COPD                               | COPD                              | 1.39  |       |        |   |
|                     |                                   |              |                 |        |           |        | Depression                         | Depression                        | 1.31  |       |        |   |
|                     |                                   |              |                 |        |           |        | Heart failure                      | CHF                               | 1.34  |       |        |   |
|                     |                                   |              |                 |        |           |        | Ischemic heart disease             | Cardiovascular disorders          | 1.64  |       |        |   |
| Osteoarthritis      | Musculoskeletal disorders         | 1.53         |                 |        |           |        |                                    |                                   |       |       |        |   |
| Osteoporosis        | Musculoskeletal disorders         | 2.18         |                 |        |           |        |                                    |                                   |       |       |        |   |
| Stroke              | Neurological disorders            | 1.58         |                 |        |           |        |                                    |                                   |       |       |        |   |
| Renal failure       | Renal disorders                   | 1.11         |                 |        |           |        |                                    |                                   |       |       |        |   |
| Diabetes type 2     | Diabetes                          | 1.38         |                 |        |           |        |                                    |                                   |       |       |        |   |
| Viral hepatitis     | Endocrine and metabolic disorders | 1.61         |                 |        |           |        |                                    |                                   |       |       |        |   |
| Imafuku et al. 2020 | Japan (2005-2014)                 | Cohort       | Claims data     | ICD-10 | 2,778,476 | 27,995 | Autoimmune thyroiditis             | Endocrine and metabolic disorders | 1.52  | 45.24 | 18-65+ | 7 |
|                     |                                   |              |                 |        |           |        | Congenital immune deficiency       | Autoimmune disorders              | 1.30  |       |        |   |
|                     |                                   |              |                 |        |           |        | Hematological malignancies         | Cancer                            | 5.12  |       |        |   |
|                     |                                   |              |                 |        |           |        | Hematopoietic stem cell transplant | Transplantation                   | 19.91 |       |        |   |
|                     |                                   |              |                 |        |           |        | IBD                                | IBD                               | 1.61  |       |        |   |
|                     |                                   |              |                 |        |           |        | Psoriasis                          | Psoriasis                         | 1.19  |       |        |   |
|                     |                                   |              |                 |        |           |        | RA                                 | RA                                | 2.13  |       |        |   |
|                     |                                   |              |                 |        |           |        | SLE                                | SLE                               | 3.40  |       |        |   |
|                     |                                   |              |                 |        |           |        | Solid organ malignancies           | Cancer                            | 1.66  |       |        |   |
|                     |                                   |              |                 |        |           |        | Vasculitis                         | Autoimmune disorders              | 1.18  |       |        |   |
|                     |                                   |              |                 |        |           |        | Asthma                             | Asthma                            | 1.16  |       |        |   |
|                     |                                   |              |                 |        |           |        | Chronic hepatitis                  | Autoimmune disorders              | 1.25  |       |        |   |
|                     |                                   |              |                 |        |           |        | Other autoimmune disease           | Autoimmune disorders              | 2.20  |       |        |   |

|                       |                    |              |                 |               |         |        |                        |                                   |      |       |        |   |
|-----------------------|--------------------|--------------|-----------------|---------------|---------|--------|------------------------|-----------------------------------|------|-------|--------|---|
|                       |                    |              |                 |               |         |        | COPD                   | COPD                              | 1.40 |       |        |   |
|                       |                    |              |                 |               |         |        | Depression             | Depression                        | 1.31 |       |        |   |
|                       |                    |              |                 |               |         |        | Heart failure          | CHF                               | 1.35 |       |        |   |
|                       |                    |              |                 |               |         |        | Ischemic heart disease | Cardiovascular disorders          | 1.66 |       |        |   |
|                       |                    |              |                 |               |         |        | Osteoarthritis         | Musculoskeletal disorders         | 1.53 |       |        |   |
|                       |                    |              |                 |               |         |        | Osteoporosis           | Musculoskeletal disorders         | 2.20 |       |        |   |
|                       |                    |              |                 |               |         |        | Stroke                 | Neurological disorders            | 1.60 |       |        |   |
|                       |                    |              |                 |               |         |        | Renal failure          | Renal disorders                   | 1.11 |       |        |   |
|                       |                    |              |                 |               |         |        | Diabetes type 2        | Diabetes                          | 1.39 |       |        |   |
|                       |                    |              |                 |               |         |        | Viral hepatitis        | Endocrine and metabolic disorders | 1.62 |       |        |   |
| Jin et al. 2020       | Korea (2002-2013)  | Case-control | Claims data     | ICD-10        | 255,604 | 21,066 | Peptic ulcer           | Digestive disorders               | -    | 51.51 | 20-85+ | 7 |
|                       |                    |              |                 |               |         |        | COPD                   | COPD                              | 1.35 |       |        |   |
|                       |                    |              |                 |               |         |        | Depression             | Depression                        | 1.52 |       |        |   |
|                       |                    |              |                 |               |         |        | Diabetes               | Diabetes                          | 1.06 |       |        |   |
| Joeseof et al. 2012   | USA (2007)         | Case-control | Data linkage    | ICD-9         | 675,350 | 59,173 | Hypothyroidism         | Endocrine and metabolic disorders | 1.16 | 54.24 | 20-64  | 7 |
|                       |                    |              |                 |               |         |        | Osteoarthritis         | Musculoskeletal disorders         | 1.24 |       |        |   |
|                       |                    |              |                 |               |         |        | CAD                    | Cardiovascular disorders          | 1.17 |       |        |   |
|                       |                    |              |                 |               |         |        | Hyperlipidemia         | Endocrine and metabolic disorders | 1.11 |       |        |   |
| Ke et al. 2016        | Taiwan (2005-2011) | Case-control | Claims data     | ICD-9         | 126,725 | 25,345 | Diabetes               | Diabetes                          | 1.24 | 53.48 | 18-70+ | 7 |
| Ke et al. 2020        | Taiwan (2000-2012) | Cohort       | Data linkage    | ICD-9         | 98,046  | 6,880  | Sciatica               | Neurological disorders            | -    | 55.85 | -      | 8 |
| Khan et al. 2018      | USA (2000-2016)    | Cohort       | Claims data     | ICD-9         | 40,142  | 1,185  | Ulcerative colitis     | Digestive disorders               | -    | 6.97  | -      | 7 |
| Khan et al. 2018      | USA (2000-2016)    | Cohort       | Claims data     | ICD-9         | 43,879  | 1,288  | Crohns disease         | Digestive disorders               | -    | 6.84  | -      | 7 |
| Khan et al. 2018      | USA (2000-2016)    | Cohort       | Claims data     | ICD-9         | 48,511  | 1,397  | IBD                    | IBD                               | -    | 6.83  | -      | 7 |
| Kim et al. 2013       | USA (1996-2001)    | Case-control | Data linkage    | ICD-9         | 554     | 277    | Asthma                 | Asthma                            | 2.09 | 52.71 | 0-17   | 7 |
| Kobayashi et al. 2019 | Japan (2005-2016)  | Cohort       | Medical records | ICD-10        | 81,466  | 59     | Diabetes               | Diabetes                          | 1.06 | 51.34 | -      | 7 |
| Kwon et al. 2016      | USA (2010-2011)    | Case-control | Medical records | ICD-9         | 1,113   | 371    | Asthma                 | Asthma                            | 1.70 | 66.31 | -      | 8 |
| La Habel et al. 2013  | USA (2001-2005)    | Cohort       | Claims data     | ICD-9         | 14,670  | 424    | Hematologic malignancy | Cancer                            | -    | 42.46 | 18-80+ | 8 |
| Lai et al. 2021       | Taiwan (2000-2013) | Cohort       | Claims data     | ICD-9         | 32,380  | 1,644  | Cirrhosis              | Digestive disorders               | -    | 32.17 | 20-84  | 8 |
| Lai et al. 2020       | Taiwan (2005-2012) | Cohort       | Claims data     | ICD-9         | 49,965  | 2,129  | Chronic kidney disease | Renal disorders                   | -    | 43.22 | 20-84  | 8 |
| Lai et al. 2020       | Taiwan (2000-2012) | Cohort       | Claims data     | ICD-9         | 3,186   | 179    | Splenectomy            | Hematological disorders           | -    | 38.98 | 20-84  | 8 |
| Lai et al. 2019       | Taiwan (2000-2012) | Cohort       | Claims data     | ICD-9         | 135,074 | 7,733  | Diabetes               | Diabetes                          | -    | 44.62 | 20-84  | 8 |
| Lai et al. 2018       | Taiwan (2000-2012) | Cohort       | Claims data     | ICD-9         | 6,567   | 243    | Chronic pancreatitis   | Digestive disorders               | -    | 31.17 | 20-84  | 8 |
| Lasserre et al. 2012  | France (2009-2010) | Case-control | Questionnaire   | Self-reported | 750     | 250    | Asthma                 | Asthma                            | 0.78 |       |        |   |
|                       |                    |              |                 |               |         |        | Diabetes               | Diabetes                          | 1.95 | 59.00 | 50-91  | 7 |
|                       |                    |              |                 |               |         |        | Arterial hypertension  | Cardiovascular disorders          | 0.84 |       |        |   |
|                       |                    |              |                 |               |         |        | Heart failure          | CHF                               | 0.74 |       |        |   |

|                          |                     |              |                 |                        |           |         |                         |                           |              |       |        |   |
|--------------------------|---------------------|--------------|-----------------|------------------------|-----------|---------|-------------------------|---------------------------|--------------|-------|--------|---|
|                          |                     |              |                 |                        |           |         | Cerebrovascular disease | Cardiovascular disorders  | 1.20         |       |        |   |
|                          |                     |              |                 |                        |           |         | COPD                    | COPD                      | 0.63         |       |        |   |
|                          |                     |              |                 |                        |           |         | Arthritis               | Musculoskeletal disorders | 1.12         |       |        |   |
|                          |                     |              |                 |                        |           |         | Rheumatism              | Musculoskeletal disorders | 0.67         |       |        |   |
|                          |                     |              |                 |                        |           |         | Headache                | Neurological disorders    | 1.09         |       |        |   |
|                          |                     |              |                 |                        |           |         | Gastric ulcer           | Digestive disorders       | 2.09         |       |        |   |
|                          |                     |              |                 |                        |           |         | HIV/AIDS                | HIV                       | 1.00         |       |        |   |
|                          |                     |              |                 |                        |           |         | Osteoporosis            | Musculoskeletal disorders | 0.81         |       |        |   |
|                          |                     |              |                 |                        |           |         | Autoimmune disease      | Autoimmune disorders      | 1.25         |       |        |   |
|                          |                     |              |                 |                        |           |         | Cancer                  | Cancer                    | 1.26         |       |        |   |
| Lee et al. 2018          | Taiwan (2012-2015)  | Cohort       | Medical records | -                      | 826       | 54      | HIV                     | HIV                       | 2.03         | 3.00  | -      | 8 |
| Lin et al. 2012          | Taiwan (1996-2008)  | Case-control | Data linkage    | ICD-9                  | 95,383    | 6,623   | Chronic kidney disease  | Renal disorders           | -            | 43.60 | 18-65+ | 9 |
| Lin et al. 2014          | Taiwan (1996-2008)  | Case-control | Claims data     | ICD-9                  | 4,999     | 1,144   | End stage renal disease | Renal disorders           | -            | 48.31 | 18-64+ | 8 |
| Long et al. 2013         | USA (1997-2009)     | Cohort       | Data linkage    | ICD-9                  | 543,020   | 7,017   | IBD                     | IBD                       | -            | 54.97 | 31-52  | 8 |
| Ludvigsson et al. 2017   | Sweden (1969-2008)  | Cohort       | Registry        | ICD-10, ICD-9          | 173,591   | 653     | Coeliac disease         | Digestive disorders       | -            | 61.89 | 18-60+ | 9 |
| Marin et al. 2016        | USA (2010-2011)     | Case-control | Data linkage    | ICD-9                  | 895       | 384     | Stress                  | Mental health condition   | 2.80         | 64.25 | 50-95  | 8 |
|                          |                     |              |                 |                        |           |         | Depression              | Depression                | 3.81         |       |        |   |
| Min et al. 2021          | Korea (2002-2013)   | Case-control | Data linkage    | ICD-10                 | 55,045    | 3,229   | Psoriasis               | Psoriasis                 | -            | 43.79 | 20-85+ | 7 |
| Min et al. 2019          | Korea (2002-2013)   | Case-control | Data linkage    | ICD-10                 | 136,984   | 6,225   | Osteoporosis            | Musculoskeletal disorders | 1.17         | 85.78 | 50-85+ | 8 |
| Mok et al. 2022          | China (2019)        | Cohort       | Medical records | Symptomatic            | 1,479     | 219     | SLE                     | SLE                       | -            | 88.30 | -      | 6 |
| Munoz-Quiles et al. 2018 | Spain (2009-2014)   | Cohort       | Claims data     | ICD-9                  | 2,289,485 | 69,438  | COPD                    | COPD                      | -            | 53.63 | 50-80+ | 7 |
| Peng et al. 2017         | Taiwan (1997-2011)  | Cohort       | Claims data     | ICD-9                  | 80,138    | 2,404   | Asthma                  | Asthma                    | -            | 48.97 | 0-61+  | 9 |
| Ryu et al. 2021          | Korea (2009-2013)   | Cohort       | Claims data     | KCD-6                  | 285,792   | 1,869   | Rheumatoid arthritis    | Rheumatoid arthritis      | -            | 69.04 | 20-70+ | 7 |
|                          |                     |              |                 |                        |           |         | SLE                     | SLE                       | -            |       |        |   |
| Schmidt et al. 2021      | Denmark (2010-2014) | Cohort       | Data linkage    | Symptomatic            | 77,310    | 1,686   | Stress                  | Mental health condition   | -            | 48.90 | 40-80+ | 9 |
| Schmidt et al. 2018      | Denmark (1997-2013) | Case-control | Registry        | Antiviral prescription | 953,355   | 190,671 | Depression              | Depression                | 1.16         | 65.83 | 18-90+ | 5 |
|                          |                     |              |                 |                        |           |         | Anxiety                 | Mental health condition   | 1.71         |       |        |   |
|                          |                     |              |                 |                        |           |         | Stress                  | Mental health condition   | 1.37         |       |        |   |
| Schmidt et al. 2017      | UK (2000-2013)      | Case-control | Data linkage    | Symptomatic            | 516,146   | 109,331 | Depression              | Depression                | 1.18         | 60.63 | 18-90+ | 5 |
|                          |                     |              |                 |                        |           |         | Anxiety                 | Mental health condition   | 1.23         |       |        |   |
|                          |                     |              |                 |                        |           |         | Stress                  | Mental health condition   | 1.22         |       |        |   |
| Schmidt et al. 2017      | Denmark (1997-2013) | Case-control | Registry        | Antiviral prescription | 953,355   | 190,671 | Partner bereavement     | Mental health condition   | 1.05         | 65.83 | 40-90+ | 5 |
|                          |                     |              |                 |                        |           |         | UK (2000-2013)          | Case-control              | Data linkage |       |        |   |
| Seo et al. 2018          | Korea (2006-2013)   | Case-control | Claims data     | ICD-10                 | 17,682    | 1,985   | Heart failure           | CHF                       | -            | 63.90 | -      | 7 |
|                          |                     |              |                 |                        | 25,008    | 1,424   | Myocardial infarction   | Cardiovascular disorders  | -            |       |        |   |
|                          |                     |              |                 |                        | 41,190    | 2,800   | Ischemic stroke         | Cardiovascular disorders  | -            |       |        |   |

|                           |                    |              |                 |               |                              |                         |                                             |                                                   |             |                         |        |   |
|---------------------------|--------------------|--------------|-----------------|---------------|------------------------------|-------------------------|---------------------------------------------|---------------------------------------------------|-------------|-------------------------|--------|---|
| Sinayobye et al. 2015     | Rwanda (2005)      | Cohort       | Questionnaire   | Self-reported | 936                          | 89                      | HIV                                         | HIV                                               | 2.43        | 100.00                  | -      | 6 |
| Smitten et al. 2007       | UK (1990-2001)     | Case-control | Medical records | OXMIS code    | 13,752                       | 1,719                   | RA                                          | RA                                                | 1.27        | 72.67                   | 18-65+ | 9 |
|                           | USA (1998-2002)    |              | Claims data     | ICD-9         | 12,888                       | 1,611                   |                                             |                                                   | 1.37        | 73.39                   |        |   |
|                           | UK (1990-2001)     | Cohort       | Medical records | OXMIS code    | 538,621                      | 10,928                  | RA                                          | RA                                                | -           | 71.70                   |        | 8 |
|                           | USA (1998-2002)    |              | Claims data     | ICD-9         | 1,122,272                    | 8,192                   |                                             |                                                   | -           | 73.10                   |        |   |
| Soh et al. 2019           | Korea (2010-2013)  | Cohort       | Claims data     | ICD-10        | 63,102<br>117,498<br>180,600 | 2,321<br>6,422<br>8,743 | Crohns disease<br>Ulcerative colitis<br>IBD | Digestive disorders<br>Digestive disorders<br>IBD | -<br>-<br>- | 27.81<br>90.17<br>36.41 | 0-60+  | 8 |
| Suaya et al. 2014         | USA (2005-2009)    | Cohort       | Claims data     | ICD-9         | 51,007,975                   | 420,515                 | Diabetes                                    | Diabetes                                          | -           | 50.10                   | 18-65+ | 8 |
| Takao et al. 2018         | Japan (2008-2009)  | Cohort       | Questionnaire   | Self-reported | 12,522                       | 400                     | Very high mental stress                     | Mental health condition                           | -           | 54.70                   | 50-103 | 6 |
|                           |                    |              |                 |               |                              |                         | Very high sense of purpose in life          | Mental health condition                           | -           |                         |        |   |
|                           |                    |              |                 |               |                              |                         | Negative life events                        | Mental health condition                           | -           |                         |        |   |
| Thomson-Leduc et al. 2022 | USA (2007-2009)    | Cohort       | Data linkage    | -             | 9,805,492                    | 75,954                  | COPD                                        | COPD                                              | -           | 53.31                   | 40-80+ | 7 |
| Tsai et al. 2015          | Taiwan (2000-2006) | Case-control | Claims data     | ICD-9         | 9,432                        | 662                     | Dermatomyositis/<br>polymyositis            | Autoimmune disorders                              | -           | 67.00                   | 20-65+ | 8 |
| Tsai et al. 2017          | Taiwan (1998-2011) | Case-control | Claims data     | ICD-9         | 20,385                       | 590                     | Psoriasis                                   | Psoriasis                                         | -           | 44.34                   | 20-60+ | 8 |
| Tung et al. 2015          | Taiwan (1996-2010) | Cohort       | Claims data     | ICD-9         | 62,319                       | 3,087                   | Brain injury                                | Neurological disorders                            | -           | 41.04                   | 18-70+ | 7 |
| Tung et al. 2020          | Taiwan (1996-2010) | Cohort       | Claims data     | ICD-9         | 41,102                       | 1,301                   | Stroke                                      | Neurological disorders                            | -           | 44.33                   | 18-70+ | 7 |
| Veetil et al. 2013        | USA (1980-2007)    | Cohort       | Medical records | ICD-9         | 1,626                        | 118                     | RA                                          | RA                                                | -           | 68.39                   | 18-94  | 8 |
| Wang et al. 2020          | Taiwan (1997-2013) | Cohort       | Claims data     | ICD-9         | 14,095                       | 488                     | Ankylosing spondylitis                      | Musculoskeletal disorders                         | -           | 38.77                   | 0-60+  | 9 |
| Weitzmann et al. 2013     | Israel (2006-2010) | Cohort       | Claims data     | ICD-9         | 2,020,709                    | 28,977                  | Diabetes                                    | Diabetes                                          | -           | 82.64                   | 0-85+  | 7 |
|                           |                    |              |                 |               |                              |                         | HIV/AIDS                                    | HIV                                               | -           |                         |        |   |
|                           |                    |              |                 |               |                              |                         | Transplantation                             | Transplantation                                   | -           |                         |        |   |
| Wi et al. 2015            | USA (1996-2001)    | Case-control | Medical records | ICD-9         | 459                          | 77                      | Asthma                                      | Asthma                                            | -           | 52.94                   | 3-18   | 8 |
| Wu et al. 2015            | Taiwan (1997-2010) | Cohort       | Claims data     | ICD-9         | 19,140                       | 211                     | Heart failure                               | CHF                                               | -           | 46.77                   | 18-80+ | 8 |
| Wu et al. 2012            | Taiwan (2004-2005) | Cohort       | Claims data     | ICD-9         | 79,926                       | 1,602                   | Chronic kidney disease                      | Renal disorders                                   | -           | 51.77                   | 18-70+ | 9 |
| Yang et al. 2011          | Taiwan (2004-2005) | Cohort       | Claims data     | ICD-9         | 42,430                       | 1,080                   | COPD                                        | COPD                                              | -           | 30.97                   | 50-70+ | 8 |
| Yang et al. 2011          | Taiwan (2004-2006) | Cohort       | Claims data     | ICD-9         | 211,700                      | 3,441                   | Psychiatric disorder                        | Mental health condition                           | -           | 60.93                   | 18-70+ | 8 |
| Yanni et al. 2018         | UK (2000-2012)     | Cohort       | Claims data     | ICD-9         | 622,900                      | 21,146                  | Hematological stem cell transplantation     | Transplantation                                   | -           | 56.11                   | 18-80+ | 8 |
|                           |                    |              |                 |               |                              |                         | HIV/AIDS                                    | HIV                                               | -           |                         |        |   |
|                           |                    |              |                 |               |                              |                         | Solid organ transplant                      | Transplantation                                   | -           |                         |        |   |
|                           |                    |              |                 |               |                              |                         | SLE                                         | SLE                                               | -           |                         |        |   |

|                   |                    |              |             |       |         |        |                            |                                   |      |       |        |   |
|-------------------|--------------------|--------------|-------------|-------|---------|--------|----------------------------|-----------------------------------|------|-------|--------|---|
|                   |                    |              |             |       |         |        | Autoimmune thyroiditis     | Endocrine and metabolic disorders | -    |       |        |   |
|                   |                    |              |             |       |         |        | Multiple sclerosis         | Autoimmune disorders              | -    |       |        |   |
|                   |                    |              |             |       |         |        | Polymyalgia rheumatica     | Musculoskeletal disorders         |      |       |        |   |
|                   |                    |              |             |       |         |        | Hematological malignancies | Cancer                            | -    |       |        |   |
|                   |                    |              |             |       |         |        | IBD                        | IBD                               | -    |       |        |   |
|                   |                    |              |             |       |         |        | Rheumatoid arthritis       | Rheumatoid arthritis              | -    |       |        |   |
|                   |                    |              |             |       |         |        | End stage renal disease    | Renal disorders                   | -    |       |        |   |
|                   |                    |              |             |       |         |        | Psoriasis                  | Psoriasis                         | -    |       |        |   |
|                   |                    |              |             |       |         |        | Solid organ malignancies   | Cancer                            | -    |       |        |   |
| Yu et al. 2021    | Taiwan (1996-2013) | Cohort       | Claims data | ICD-9 | 8,732   | 60     | Polycystic kidney disease  | Renal disorders                   | -    | 43.09 | 20-65+ | 8 |
| Zhang et al. 2013 | USA (2006-2007)    | Case-control | Claims data | ICD-9 | 184,473 | 16,771 | Trauma                     | Mental health condition           | 1.09 | -     | 65+    | 8 |
