# Supplementary material for: Risk factors for herpes zoster infections: a systematic review and meta-analysis unveiling common trends and heterogeneity patterns
Source: PubMed Central journal article supplement (PMC11142967; doi:10.1007/s15010-023-02156-y), 2024-01-18
Supplement: 15010_2023_2156_MOESM6_ESM.pdf [file 15010_2023_2156_MOESM6_ESM.pdf]

## S6: Subgroup analyses.

Note:  $n_k$ : number of studies; \* indicates significant values ( $p < 0.005$ ),  $p_h$  ' defines the p-value for heterogeneity between subgroups,  $p_h$  '' defines the p-value for heterogeneity within subgroups.

Please note, that we only did subgroup analyses for risk factors, when at least  $k > 10$  studies were available. This was done in order to provide enough statistical power and robust results (see Schwarzer, Guido, James R Carpenter, and Gerta Rücker. 2015. Meta-Analysis with r. Springer. Chapter 4.3).

| Subgroups                   | Effect size |      |              | Heterogeneity |          |          |
|-----------------------------|-------------|------|--------------|---------------|----------|----------|
|                             | $n_k$       | OR   | 95% CI       | $I^2$         | $p_h$ '  | $p_h$ '' |
| <b>Asthma</b>               |             |      |              |               |          |          |
| All studies                 | 11          | 1.30 | [1.19-1.42]* | 89.22%        |          |          |
| Study design                |             |      |              |               | 0.5954   | < 0.0001 |
| Cohort studies              | 6           | 1.28 | [1.17- 1.41] | 89.0%         |          |          |
| Case-control studies        | 5           | 1.36 | [0.99-1.87]  | 69.2%         |          |          |
| Study year                  |             |      |              |               | 0.2550   | < 0.0001 |
| 2003-2008                   | -           | -    | -            | -             |          |          |
| 2011-2016                   | 6           | 1.38 | [1.13-1.68]  | 93.7%         |          |          |
| 2017-2022                   | 5           | 1.25 | [1.13- 1.38] | 64.5%         |          |          |
| Region                      |             |      |              |               | < 0.0001 | < 0.0001 |
| Europe                      | 4           | 1.26 | [1.09-1.46]  | 63.1%         |          |          |
| Northern America            | 3           | 1.78 | [1.33-2.40]  | 0.00%         |          |          |
| Asia                        | 4           | 1.27 | [1.06-1.52]  | 96.0%         |          |          |
| Middle East                 | -           | -    | -            | -             |          |          |
| Sample size                 |             |      |              |               | 0.1130   | < 0.0001 |
| < 100.000                   | 5           | 1.49 | [1.16-1.90]  | 43.4%         |          |          |
| 100.000- 999.999            | 2           | 1.23 | [0.95-1.60]  | 0.0%          |          |          |
| ≥ 1.000.000                 | 4           | 1.26 | [1.07-1.48]  | 92.8%         |          |          |
| <b>Autoimmune Disorders</b> |             |      |              |               |          |          |
| All studies                 | 16          | 1.33 | [0.98-1.80]  | 98.28%        |          |          |
| Study design                |             |      |              |               | 0.6123   | < 0.0001 |
| Cohort studies              | 14          | 1.32 | [0.93-1.87]  | 98.5%         |          |          |
| Case-control studies        | 2           | 1.45 | [0.37- 5.74] | 0.00%         |          |          |
| Study year                  |             |      |              |               | 0.8321   | < 0.0001 |
| 2003-2008                   | -           | -    | -            | -             |          |          |
| 2011-2016                   | 7           | 1.28 | [0.59-2.77]  | 99.2%         |          |          |
| 2017-2022                   | 9           | 1.37 | [1.11-1.69]  | 76.9%         |          |          |
| Region                      |             |      |              |               | 0.7088   | < 0.0001 |
| Europe                      | 11          | 1.24 | [0.81-1.90]  | 98.2%         |          |          |
| Northern America            | 1           | 1.73 | [0.55-5.46]  | -             |          |          |
| Asia                        | 4           | 1.52 | [0.80-2.89]  | 98.3%         |          |          |
| Middle East                 | -           | -    | -            | -             |          |          |
| Sample size                 |             |      |              |               | 0.4338   | < 0.0001 |
| < 100.000                   | 4           | 0.90 | [0.16- 4.92] | 99.4%         |          |          |
| 100.000- 999.999            | 2           | 1.25 | [0.07-21.78] | 90.5%         |          |          |
| ≥ 1.000.000                 | 10          | 1.55 | [1.25-1.91]  | 95.4%         |          |          |
| <b>Cancer</b>               |             |      |              |               |          |          |
| All studies                 | 20          | 2.42 | [1.91-3.07]* | 99.07%        |          |          |
| Study design                |             |      |              |               | 0.0481   | 0        |
| Cohort studies              | 17          | 2.62 | [2.03-3.38]  | 98.9%         |          |          |

|                                 |    |      |                 |        |        |          |
|---------------------------------|----|------|-----------------|--------|--------|----------|
| Case-control studies            | 3  | 1.56 | [0.57-4.24]     | 99.4%  |        |          |
| Study year                      |    |      |                 |        | 0.4783 | < 0.0001 |
| 2003-2008                       | -  | -    | -               | -      |        |          |
| 2011-2016                       | 12 | 2.60 | [1.90-3.56]     | 96.6%  |        |          |
| 2017-2022                       | 8  | 2.20 | [1.39-3.47]     | 98.8%  |        |          |
| Region                          |    |      |                 |        | 0.0036 | < 0.0001 |
| Europe                          | 12 | 2.98 | [2.10-4.22]     | 96.8%  |        |          |
| Northern America                | 2  | 2.37 | [1.13-4.99]     | 18.4%  |        |          |
| Asia                            | 6  | 1.66 | [1.25-2.22]     | 98.9%  |        |          |
| Middle East                     | -  | -    | -               | -      |        |          |
| Sample size                     |    |      |                 |        | 0.0465 | < 0.0001 |
| < 100.000                       | 12 | 2.48 | [1.75-3.50]     | 98.0%  |        |          |
| 100.000- 999.999                | 2  | 1.68 | [0.43-6.51]     | 97.9%  |        |          |
| ≥ 1.000.000                     | 6  | 2.63 | [1.51-4.57]     | 98.7%  |        |          |
| <b>Cardiovascular Disorders</b> |    |      |                 |        |        |          |
| All studies                     | 11 | 1.39 | [1.12-1.73]*    | 99.33% |        |          |
| Study design                    |    |      |                 |        | 0.0002 | < 0.0001 |
| Cohort studies                  | 6  | 1.69 | [1.27-2.25]     | 56.9%  |        |          |
| Case-control studies            | 5  | 1.06 | [0.90-1.25]     | 99.6%  |        |          |
| Study year                      |    |      |                 |        | 0.3094 | < 0.0001 |
| 2003-2008                       | -  | -    | -               | -      |        |          |
| 2011-2016                       | 6  | 1.53 | [1.02-2.28]     | 99.1%  |        |          |
| 2017-2022                       | 5  | 1.26 | [0.93-1.71]     | 94.9%  |        |          |
| Region                          |    |      |                 |        | 0.8660 | < 0.0001 |
| Europe                          | 5  | 1.43 | [1.01-2.01]     | 94.5%  |        |          |
| Northern America                | 1  | 1.17 | [0.59-2.32]     | -      |        |          |
| Asia                            | 5  | 1.40 | [0.82-2.39]     | 99.7%  |        |          |
| Middle East                     | -  | -    | -               | -      |        |          |
| Sample size                     |    |      |                 |        | 0.1909 | < 0.0001 |
| < 100.000                       | 5  | 1.18 | [0.79-1.77]     | 92.7%  |        |          |
| 100.000- 999.999                | 1  | 1.17 | [0.65-2.11]     | -      |        |          |
| ≥ 1.000.000                     | 5  | 1.65 | [1.15-2.38]     | 99.6%  |        |          |
| <b>COPD</b>                     |    |      |                 |        |        |          |
| All studies                     | 10 | 1.55 | [1.04-2.31]*    | 99.91% |        |          |
| Study design                    |    |      |                 |        | 0.1367 | 0        |
| Cohort studies                  | 7  | 1.77 | [1.04-3.00]     | 99.9%  |        |          |
| Case-control studies            | 3  | 1.11 | [0.41-2.98]     | 52.2%  |        |          |
| Study year                      |    |      |                 |        | 0.5915 | 0        |
| 2003-2008                       | -  | -    | -               | -      |        |          |
| 2011-2016                       | 5  | 1.40 | [0.82-2.39]     | 99.1%  |        |          |
| 2017-2022                       | 5  | 1.70 | [0.72-4.01]     | 100.0% |        |          |
| Region                          |    |      |                 |        | 0.4340 | 0        |
| Europe                          | 3  | 1.50 | [1.12-2.02]     | 59.9%  |        |          |
| Northern America                | 2  | 2.78 | [0.00-25982.13] | 99.9%  |        |          |
| Asia                            | 5  | 1.24 | [0.74-2.09]     | 99.5%  |        |          |
| Middle East                     | -  | -    | -               | -      |        |          |
| Sample size                     |    |      |                 |        | 0.5055 | 0        |
| < 100.000                       | 2  | 1.13 | [0.00-609.23]   | 85.8%  |        |          |

|                            |    |      |                |        |          |          |
|----------------------------|----|------|----------------|--------|----------|----------|
| 100.000- 999.999           | 2  | 1.33 | [1.16-1.54]    | 0.0%   |          |          |
| ≥ 1.000.000                | 6  | 1.78 | [0.92-3.42]    | 99.9%  |          |          |
| <b>Diabetes</b>            |    |      |                |        |          |          |
| All studies                | 17 | 1.26 | [1.03-1.54]*   | 99.70% |          |          |
| Study design               |    |      |                |        | 0.8398   | 0        |
| Cohort studies             | 12 | 1.25 | [0.94-1.66]    | 99.6%  |          |          |
| Case-control studies       | 5  | 1.29 | [0.94-1.77]    | 98.4%  |          |          |
| Study year                 |    |      |                |        | 0.4794   | 0        |
| 2003-2008                  | 1  | 1.53 | [0.70-3.36]    | -      |          |          |
| 2011-2016                  | 9  | 1.34 | [0.90-2.00]    | 99.8%  |          |          |
| 2017-2022                  | 7  | 1.12 | [0.98-1.29]    | 89.3%  |          |          |
| Region                     |    |      |                |        | 0.7025   | 0        |
| Europe                     | 7  | 1.43 | [1.10-1.86]    | 94.4%  |          |          |
| Northern America           | 2  | 1.36 | [0.06-33.12]   | 99.9%  |          |          |
| Asia                       | 6  | 1.23 | [0.87- 1.74]   | 99.7%  |          |          |
| Middle East                | 2  | 0.82 | [0.00-2287.12] | 99.8%  |          |          |
| Sample size                |    |      |                |        | 0.3105   | 0        |
| < 100.000                  | 5  | 1.56 | [0.96-2.53]    | 90.7%  |          |          |
| 100.000- 999.999           | 5  | 1.18 | [0.96-1.44]    | 98.4%  |          |          |
| ≥ 1.000.000                | 7  | 1.16 | [0.73-1.84]    | 99.8%  |          |          |
| <b>Digestive Disorders</b> |    |      |                |        |          |          |
| All studies                | 11 | 1.26 | [0.98-1.61]    | 97.18% |          |          |
| Study design               |    |      |                |        | 0.3841   | < 0.0001 |
| Cohort studies             | 10 | 1.23 | [0.95-1.60]    | 97.5%  |          |          |
| Case-control studies       | 1  | 2.09 | [0.65-6.69]    | -      |          |          |
| Study year                 |    |      |                |        | 0.0022   | < 0.0001 |
| 2003-2008                  | -  | -    | -              | -      |          |          |
| 2011-2016                  | 2  | 1.83 | [0.69-4.87]    | 0.0%   |          |          |
| 2017-2022                  | 9  | 1.19 | [0.90-1.56]    | 97.2%  |          |          |
| Region                     |    |      |                |        | < 0.0001 | < 0.0001 |
| Europe                     | 6  | 1.33 | [0.91-1.95]    | 98.2%  |          |          |
| Northern America           | 2  | 0.80 | [0.50-1.30]    | 0.0%   |          |          |
| Asia                       | 3  | 1.59 | [1.14-2.22]    | 0.0%   |          |          |
| Middle East                | -  | -    | -              | -      |          |          |
| Sample size                |    |      |                |        | 0.3545   | < 0.0001 |
| < 100.000                  | 8  | 1.20 | [0.84- 1.73]   | 97.9%  |          |          |
| 100.000- 999.999           | 3  | 1.40 | [1.10-1.78]    | 85.9%  |          |          |
| ≥ 1.000.000                | -  | -    | -              | -      |          |          |
| <b>HIV</b>                 |    |      |                |        |          |          |
| All studies                | 12 | 1.81 | [1.21-2.69]*   | 93.67% |          |          |
| Study design               |    |      |                |        | 0.5455   | < 0.0001 |
| Cohort studies             | 9  | 1.66 | [1.09-2.53]    | 94.5%  |          |          |
| Case-control studies       | 3  | 2.34 | [0.24-23.03]   | 92.1%  |          |          |
| Study year                 |    |      |                |        | 0.0355   | < 0.0001 |
| 2003-2008                  | 3  | 1.14 | [0.57- 2.26]   | 0.0%   |          |          |
| 2011-2016                  | 7  | 2.48 | [1.32-4.66]    | 89.4%  |          |          |
| 2017-2022                  | 2  | 1.46 | [0.04-59.82]   | 73.7%  |          |          |
| Region                     |    |      |                |        | 0.3870   | < 0.0001 |

|                                  |    |      |               |        |        |          |
|----------------------------------|----|------|---------------|--------|--------|----------|
| Europe                           | 1  | 2.03 | [0.56-7.41]   | -      |        |          |
| Northern America                 | 4  | 1.88 | [0.72-4.91]   | 81.3%  |        |          |
| Asia                             | 4  | 2.28 | [0.72-7.23]   | 96.4%  |        |          |
| Middle East                      | 3  | 1.06 | [0.27-4.14]   | 10.1%  |        |          |
| Sample size                      |    |      |               |        | 0.8924 | < 0.0001 |
| < 100.000                        | 6  | 1.60 | [1.01-2.53]   | 0.0%   |        |          |
| 100.000- 999.999                 | 3  | 1.91 | [0.22-16.44]  | 97.5%  |        |          |
| ≥ 1.000.000                      | 3  | 1.92 | [0.27-13.46]  | 95.1%  |        |          |
| <b>Mental Health Condition</b>   |    |      |               |        |        |          |
| All studies                      | 15 | 1.43 | [0.98-2.11]   | 99.65% |        |          |
| Study design                     |    |      |               |        | 0.7481 | 0        |
| Cohort studies                   | 7  | 1.53 | [0.61-3.85]   | 99.8%  |        |          |
| Case-control studies             | 8  | 1.35 | [1.02-1.79]   | 91.0%  |        |          |
| Study year                       |    |      |               |        | 0.1409 | 0        |
| 2003-2008                        | -  | -    | -             | -      |        |          |
| 2011-2016                        | 4  | 2.65 | [0.43-16.22]  | 99.9%  |        |          |
| 2017-2022                        | 11 | 1.14 | [0.96-1.36]   | 82.1%  |        |          |
| Region                           |    |      |               |        | 0.6920 | 0        |
| Europe                           | 5  | 1.66 | [0.37-7.43]   | 99.8%  |        |          |
| Northern America                 | 2  | 1.73 | [0.00-693.76] | 97.6%  |        |          |
| Asia                             | 8  | 1.25 | [1.08-1.44]   | 86.0%  |        |          |
| Middle East                      | -  | -    | -             | -      |        |          |
| Sample size                      |    |      |               |        | 0.4062 | 0        |
| < 100.000                        | 6  | 1.21 | [0.72-2.03]   | 89.9%  |        |          |
| 100.000- 999.999                 | 9  | 1.60 | [0.86-2.98]   | 99.8%  |        |          |
| ≥ 1.000.000                      | -  | -    | -             | -      |        |          |
| <b>Musculoskeletal Disorders</b> |    |      |               |        |        |          |
| All studies                      | 14 | 1.43 | [1.22-1.67]*  | 96.45% |        |          |
| Study design                     |    |      |               |        | 0.0006 | < 0.0001 |
| Cohort studies                   | 6  | 1.74 | [1.36-2.21]   | 94.3%  |        |          |
| Case-control studies             | 8  | 1.21 | [1.09-1.35]   | 24.4%  |        |          |
| Study year                       |    |      |               |        | 0.0078 | < 0.0001 |
| 2003-2008                        | -  | -    | -             | -      |        |          |
| 2011-2016                        | 4  | 1.08 | [0.78-1.51]   | 18.6%  |        |          |
| 2017-2022                        | 10 | 1.53 | [1.29-1.82]   | 96.6%  |        |          |
| Region                           |    |      |               |        | 0.7310 | < 0.0001 |
| Europe                           | 9  | 1.48 | [1.23-1.78]   | 93.5%  |        |          |
| Northern America                 | 1  | 1.24 | [0.73-2.09]   | -      |        |          |
| Asia                             | 4  | 1.31 | [0.63-2.69]   | 88.9%  |        |          |
| Middle East                      | -  | -    | -             | -      |        |          |
| Sample size                      |    |      |               |        | 0.0025 | < 0.0001 |
| < 100.000                        | 7  | 1.20 | [1.03-1.39]   | 0.0%   |        |          |
| 100.000- 999.999                 | 3  | 1.43 | [0.68-2.98]   | 99.3%  |        |          |
| ≥ 1.000.000                      | 4  | 1.81 | [1.30-2.50]   | 89.9%  |        |          |
| <b>Renal Disorders</b>           |    |      |               |        |        |          |
| All studies                      | 10 | 1.17 | [0.93-1.48]   | 94.82% |        |          |
| Study design                     |    |      |               |        | 0.6750 | < 0.0001 |
| Cohort studies                   | 7  | 1.20 | [0.84-1.73]   | 95.7%  |        |          |

|                                     |    |      |               |        |          |          |
|-------------------------------------|----|------|---------------|--------|----------|----------|
| Case-control studies                | 3  | 1.12 | [0.79-1.60]   | 90.3%  |          |          |
| Study year                          |    |      |               |        | 0.1222   | < 0.0001 |
| 2003-2008                           | -  | -    | -             | -      |          |          |
| 2011-2016                           | 5  | 1.33 | [0.91-1.94]   | 93.8%  |          |          |
| 2017-2022                           | 5  | 0.99 | [0.69-1.43]   | 92.9%  |          |          |
| Region                              |    |      |               |        | 0.4398   | < 0.0001 |
| Europe                              | 8  | 1.20 | [0.89-1.64]   | 95.1%  |          |          |
| Northern America                    | -  | -    | -             | -      |          |          |
| Asia                                | 2  | 1.08 | [0.55-2.13]   | 90.8%  |          |          |
| Middle East                         | -  | -    | -             | -      |          |          |
| Sample size                         |    |      |               |        | 0.7355   | < 0.0001 |
| < 100.000                           | 6  | 1.23 | [0.80-1.90]   | 96.5%  |          |          |
| 100.000- 999.999                    | 2  | 1.08 | [0.55-2.13]   | 90.8%  |          |          |
| ≥ 1.000.000                         | 2  | 1.11 | [1.06-1.16]   | 0.00%  |          |          |
| <b>Rheumatoid Arthritis</b>         |    |      |               |        |          |          |
| All studies                         | 13 | 1.62 | [1.29-2.02]*  | 99.03% |          |          |
| Study design                        |    |      |               |        | 0.1071   | < 0.0001 |
| Cohort studies                      | 10 | 1.70 | [1.27-2.29]   | 99.0%  |          |          |
| Case-control studies                | 3  | 1.37 | [1.15-1.63]   | 11.5%  |          |          |
| Study year                          |    |      |               |        | 0.8548   | < 0.0001 |
| 2003-2008                           | 4  | 1.73 | [1.04-2.87]   | 96.3%  |          |          |
| 2011-2016                           | 4  | 1.66 | [0.89-3.10]   | 99.4%  |          |          |
| 2017-2022                           | 5  | 1.50 | [0.85-2.64]   | 98.6%  |          |          |
| Region                              |    |      |               |        | 0.9895   | < 0.0001 |
| Europe                              | 4  | 1.57 | [0.65-3.77]   | 98.1%  |          |          |
| Northern America                    | 4  | 1.64 | [0.87-3.10]   | 96.5%  |          |          |
| Asia                                | 5  | 1.64 | [1.18-2.26]   | 98.6%  |          |          |
| Middle East                         | -  | -    | -             | -      |          |          |
| Sample size                         |    |      |               |        | 0.0821   | < 0.0001 |
| < 100.000                           | 4  | 1.38 | [0.85-2.23]   | 82.6%  |          |          |
| 100.000- 999.999                    | 4  | 1.46 | [0.63-3.37]   | 99.5%  |          |          |
| ≥ 1.000.000                         | 5  | 1.99 | [1.56-2.54]   | 98.2%  |          |          |
| <b>Systemic Lupus Erythematosus</b> |    |      |               |        |          |          |
| All studies                         | 10 | 2.87 | [1.99-4.13]*  | 97.59% |          |          |
| Study design                        |    |      |               |        | 0.2756   | < 0.0001 |
| Cohort studies                      | 9  | 3.07 | [2.08-4.52]   | 97.4%  |          |          |
| Case-control studies                | 1  | 1.72 | [0.64-4.61]   | -      |          |          |
| Study year                          |    |      |               |        | 0.1464   | < 0.0001 |
| 2003-2008                           | -  | -    | -             | -      |          |          |
| 2011-2016                           | 4  | 2.23 | [0.96-5.16]   | 98.5%  |          |          |
| 2017-2022                           | 6  | 3.54 | [2.23-5.62]   | 96.9%  |          |          |
| Region                              |    |      |               |        | < 0.0001 | < 0.0001 |
| Europe                              | 6  | 4.31 | [3.42-5.43]   | 9.3%   |          |          |
| Northern America                    | 2  | 1.94 | [0.01-444.11] | 99.2%  |          |          |
| Asia                                | 2  | 1.78 | [1.15-2.76]   | 0.0%   |          |          |
| Middle East                         | -  | -    | -             | -      |          |          |
| Sample size                         |    |      |               |        | 0.7397   | < 0.0001 |
| < 100.000                           | 4  | 3.02 | [0.92-9.85]   | 96.9%  |          |          |

|                        |    |       |                |        |          |          |
|------------------------|----|-------|----------------|--------|----------|----------|
| 100.000- 999.999       | 3  | 2.48  | [0.59-10.42]   | 99.1%  |          |          |
| ≥ 1.000.000            | 3  | 3.21  | [2.61-3.95]    | 0.0%   |          |          |
| <b>Transplantation</b> |    |       |                |        |          |          |
| All studies            | 10 | 4.51  | [1.90-10.70]*  | 98.43% |          |          |
| Study design           |    |       |                |        | 0.3768   | < 0.0001 |
| Cohort studies         | 9  | 4.08  | [1.60-10.38]   | 98.6%  |          |          |
| Case-control studies   | 1  | 13.46 | [1.08-168.42]  | -      |          |          |
| Study year             |    |       |                |        | 0.4654   | < 0.0001 |
| 2003-2008              | 2  | 2.75  | [0.00-3659.43] | 78.8%  |          |          |
| 2011-2016              | 4  | 3.33  | [0.32-34.85]   | 98.5%  |          |          |
| 2017-2022              | 4  | 7.35  | [1.10-49.38]   | 99.2%  |          |          |
| Region                 |    |       |                |        | < 0.0001 | < 0.0001 |
| Europe                 | 2  | 19.84 | [18.94-20.77]  | 0.0%   |          |          |
| Northern America       | 4  | 3.65  | [1.48-9.04]    | 98.4%  |          |          |
| Asia                   | 3  | 3.73  | [0.39-35.69]   | 97.6%  |          |          |
| Middle East            | 1  | 0.34  | [0.057-1.99]   | -      |          |          |
| Sample size            |    |       |                |        | 0.7209   | < 0.0001 |
| < 100.000              | 2  | 2.75  | [0.00-3659.12] | 78.8%  |          |          |
| 100.000- 999.999       | 3  | 4.36  | [0.37-51.60]   | 97.6%  |          |          |
| ≥ 1.000.000            | 5  | 5.50  | [0.78-38.93]   | 99.0%  |          |          |
