# Supplementary material for: Risk factors for herpes zoster infections: a systematic review and meta-analysis unveiling common trends and heterogeneity patterns
Source: PubMed Central journal article supplement (PMC11142967; doi:10.1007/s15010-023-02156-y), 2024-01-18
Supplement: 15010_2023_2156_MOESM8_ESM.pdf [file 15010_2023_2156_MOESM8_ESM.pdf]

## S8. Meta-regression analyses.

Note: \* show significance for R<sup>2</sup> (explained heterogeneity) at p < 0.005 before conducting permutation tests.

| Moderator                       | R <sup>2</sup> (in %) | Estimate | SE     | z-value | p-value (permutation) | 95% CI           |
|---------------------------------|-----------------------|----------|--------|---------|-----------------------|------------------|
| <b>Asthma</b>                   | 0.00                  |          |        |         |                       |                  |
| Year                            |                       | -0.0429  | 0.0386 | -1.1113 | 0.3860                | [-0.119; 0.033]  |
| Study design                    |                       | 0.2563   | 0.2992 | 0.8567  | 0.4290                | [-0.330; 0.843]  |
| Region                          |                       | 0.1699   | 0.1893 | 0.8971  | 0.4360                | [-0.201; 0.541]  |
| Sample Size                     |                       | 0.1495   | 0.1872 | 0.7981  | 0.4890                | [-0.218; 0.517]  |
| <b>Autoimmune disorders</b>     | 0.00                  |          |        |         |                       |                  |
| Year                            |                       | 0.0346   | 0.0654 | 0.5294  | 0.5780                | [-0.094; 0.163]  |
| Study design                    |                       | 0.0549   | 0.7028 | 0.0781  | 0.9010                | [-1.323; 1.432]  |
| Region                          |                       | -0.1387  | 0.2508 | -0.5530 | 0.4740                | [-0.630; 0.353]  |
| Sample Size                     |                       | 0.1058   | 0.1734 | 0.6104  | 0.3780                | [-0.234; 0.446]  |
| <b>Cancer</b>                   | 7.90                  |          |        |         |                       |                  |
| Year                            |                       | -0.0039  | 0.0327 | -0.1188 | 0.9120                | [-0.068; 0.060]  |
| Study design                    |                       | -0.1188  | 0.3913 | -0.3037 | 0.7510                | [-0.886; 0.648]  |
| Region                          |                       | 0.2599   | 0.1576 | 1.6485  | 0.1160                | [-0.049; 0.569]  |
| Sample Size                     |                       | 0.0212   | 0.1121 | 0.1894  | 0.8320                | [-0.199; 0.241]  |
| <b>Cardiovascular disorders</b> | 72.78                 |          |        |         |                       |                  |
| Year                            |                       | -0.0824  | 0.0335 | -2.4632 | 0.0620                | [-0.148; -0.017] |
| Study design                    |                       | -0.2298  | 0.2791 | -0.8234 | 0.4340                | [-0.777; 0.317]  |
| Region                          |                       | 0.2996   | 0.1781 | 1.6821  | 0.1680                | [-0.050; 0.649]  |
| Sample Size                     |                       | 0.3226   | 0.2456 | 1.3135  | 0.2590                | [-0.159; 0.804]  |
| <b>CHF</b>                      | 71.88                 |          |        |         |                       |                  |
| Year                            |                       | -0.1585* | 0.0569 | -2.7869 | 0.1020                | [-0.270; -0.047] |
| Study design                    |                       | 0.0121   | 0.3601 | 0.0337  | 0.9760                | [-0.694; 0.718]  |
| Region                          |                       | 0.5151   | 0.2715 | 1.8974  | 0.2100                | [-0.017; 1.047]  |
| Sample Size                     |                       | 0.5677   | 0.3567 | 1.5917  | 0.2600                | [-0.131; 1.267]  |
| <b>COPD</b>                     | 45.22                 |          |        |         |                       |                  |
| Year                            |                       | -0.0789  | 0.0542 | -1.4558 | 0.2050                | [-0.185; 0.027]  |
| Study design                    |                       | 0.1165   | 0.4007 | 0.2907  | 0.8220                | [-0.669; 0.902]  |
| Region                          |                       | 0.2882   | 0.1740 | 1.6567  | 0.1420                | [-0.053; 0.629]  |
| Sample Size                     |                       | 0.6826*  | 0.2345 | 2.9112  | 0.0240                | [0.223; 1.142]   |
| <b>Depression</b>               | 0.00                  |          |        |         |                       |                  |
| Year                            |                       | -0.0357  | 0.0593 | -0.6018 | 0.5600                | [-0.152; 0.081]  |
| Study design                    |                       | -0.1239  | 0.7354 | -0.1685 | 0.8560                | [-1.565; 1.318]  |
| Region                          |                       | 0.0366   | 0.2247 | 0.1627  | 0.8820                | [-0.404; 0.477]  |
| Sample Size                     |                       | -0.0579  | 0.3488 | -0.1659 | 0.9130                | [-0.741; 0.626]  |
| <b>Diabetes</b>                 | 0.00                  |          |        |         |                       |                  |
| Year                            |                       | -0.0462  | 0.0356 | -1.2994 | 0.2210                | [-0.116; 0.024]  |
| Study design                    |                       | -0.1820  | 0.3041 | -0.5985 | 0.5490                | [-0.778; 0.414]  |
| Region                          |                       | -0.0934  | 0.1087 | -0.8593 | 0.4430                | [-0.306; 0.120]  |
| Sample Size                     |                       | 0.0291   | 0.1134 | 0.2563  | 0.7780                | [-0.193; 0.251]  |
| <b>Digestive disorders</b>      | 0.00                  |          |        |         |                       |                  |
| Year                            |                       | -0.0322  | 0.0562 | -0.5732 | 0.6140                | [-0.142; 0.078]  |
| Study design                    |                       | 0.3965   | 0.8023 | 0.4941  | 0.6100                | [-1.176; 1.969]  |
| Region                          |                       | -0.0185  | 0.1660 | -0.1117 | 0.9140                | [-0.344; 0.307]  |
| Sample Size                     |                       | 0.0994   | 0.1372 | 0.7250  | 0.4970                | [-0.169; 0.368]  |

| Moderator                                | R <sup>2</sup> (in %) | Estimate | SE     | z-value | p-value (permutation) | 95% CI           |
|------------------------------------------|-----------------------|----------|--------|---------|-----------------------|------------------|
| <b>Endocrine and metabolic disorders</b> | 98.63                 |          |        |         |                       |                  |
| Year                                     |                       | 0.0073   | 0.1000 | 0.0727  | 0.9220                | [-0.189; 0.203]  |
| Study design                             |                       | 0.1773   | 0.7704 | 0.2301  | 0.8010                | [-1.333; 1.687]  |
| Region                                   |                       | 0.1646   | 0.1791 | 0.9189  | 0.4010                | [-0.187; 0.516]  |
| Sample Size                              |                       | 0.1686   | 0.1183 | 1.4257  | 0.2380                | [-0.063; 0.401]  |
| <b>Hematological disorders</b>           | 10.36                 |          |        |         |                       |                  |
| Year                                     |                       | 0.0591   | 0.2202 | 0.2683  | 0.8119                | [-0.372; 0.491]  |
| Study design                             |                       | 1.5403   | 2.1824 | 0.7058  | 0.5214                | [-2.737; 5.818]  |
| Region                                   |                       | 0.1043   | 0.4373 | 0.2386  | 0.8333                | [-0.753; 0.961]  |
| Sample Size                              |                       | -        | -      | -       | -                     | -                |
| <b>HIV</b>                               | 32.61                 |          |        |         |                       |                  |
| Year                                     |                       | 0.0346   | 0.0415 | 0.8328  | 0.4610                | [-0.047; 0.116]  |
| Study design                             |                       | 0.6169   | 0.4198 | 1.4694  | 0.2200                | [-0.206; 1.440]  |
| Region                                   |                       | -0.2086  | 0.1560 | -1.3371 | 0.2830                | [-0.514; 0.097]  |
| Sample Size                              |                       | 0.2127   | 0.1526 | 1.3940  | 0.2240                | [-0.086; 0.512]  |
| <b>IBD</b>                               | 53.24                 |          |        |         |                       |                  |
| Year                                     |                       | -0.2714* | 0.0804 | -3.3739 | 0.1160                | [-0.429; -0.114] |
| Study design                             |                       | -0.7395  | 0.5532 | -1.3366 | 0.3360                | [-1.824; 0.345]  |
| Region                                   |                       | 0.3978   | 0.2489 | 1.5980  | 0.2060                | [-0.090; 0.886]  |
| Sample Size                              |                       | -0.2939  | 0.1820 | -1.6152 | 0.2800                | [-0.651; 0.063]  |
| <b>Mental health condition</b>           | 41.97                 |          |        |         |                       |                  |
| Year                                     |                       | -0.2908* | 0.0827 | -3.5146 | 0.0420                | [-0.453; -0.129] |
| Study design                             |                       | -1.0695  | 0.5202 | -2.0559 | 0.1000                | [-2.089; -0.050] |
| Region                                   |                       | -0.6516  | 0.3265 | -1.9955 | 0.0650                | [-1.292; -0.012] |
| Sample Size                              |                       | -0.0480  | 0.2251 | -0.2132 | 0.8300                | [-0.490; 0.393]  |
| <b>Musculoskeletal disorders</b>         | 62.94                 |          |        |         |                       |                  |
| Year                                     |                       | 0.0520   | 0.0272 | 1.9098  | 0.0790                | [-0.001; 0.105]  |
| Study design                             |                       | -0.0195  | 0.1836 | -0.1064 | 0.9310                | [-0.379; 0.340]  |
| Region                                   |                       | -0.2011  | 0.1125 | -1.7876 | 0.1110                | [-0.422; 0.019]  |
| Sample Size                              |                       | 0.1819   | 0.0922 | 1.9723  | 0.0800                | [0.001; 0.363]   |
| <b>Neurological disorders</b>            | 0.00                  |          |        |         |                       |                  |
| Year                                     |                       | 0.1075   | 0.0777 | 1.3831  | 0.3042                | [0.045; 0.260]   |
| Study design                             |                       | 0.3051   | 0.6732 | 0.4532  | 0.6500                | [-1.014; 1.625]  |
| Region                                   |                       | -        | -      | -       | -                     | -                |
| Sample Size                              |                       | -0.0648  | 0.1716 | -0.3775 | 0.7931                | [-0.401; 0.272]  |
| <b>Psoriasis</b>                         | 100.00                |          |        |         |                       |                  |
| Year                                     |                       | -0.0440  | 0.0467 | -0.9404 | 0.4903                | [-0.136; 0.048]  |
| Study design                             |                       | 0.0792   | 0.1433 | 0.5524  | 0.6944                | [-0.202; 0.360]  |
| Region                                   |                       | 0.0814   | 0.0357 | 2.2821  | 0.2278                | [0.012; 0.151]   |
| Sample Size                              |                       | 0.0381   | 0.0807 | 0.4727  | 0.6819                | [-0.120; 0.196]  |
| <b>Rheumatoid arthritis</b>              | 1.83                  |          |        |         |                       |                  |
| Year                                     |                       | -0.0274  | 0.0210 | -1.3035 | 0.2200                | [-0.069; 0.014]  |
| Study design                             |                       | -0.3512  | 0.2860 | -1.2279 | 0.2300                | [-0.912; 0.209]  |
| Region                                   |                       | -0.0413  | 0.1345 | -0.3066 | 0.7430                | [-0.305; 0.223]  |
| Sample Size                              |                       | 0.1109   | 0.1058 | 1.0480  | 0.2950                | [-0.097; 0.318]  |

| Moderator                           | R <sup>2</sup> (in %) | Estimate | SE     | z-value | p-value (permutation) | 95% CI          |
|-------------------------------------|-----------------------|----------|--------|---------|-----------------------|-----------------|
| <b>Renal disorders</b>              | 11.95                 |          |        |         |                       |                 |
| Year                                |                       | -0.0675  | 0.0347 | -1.9438 | 0.1210                | [-0.136; 0.001] |
| Study design                        |                       | -0.2832  | 0.2459 | -1.1516 | 0.3250                | [-0.765; 0.199] |
| Region                              |                       | 0.0091   | 0.1210 | 0.0755  | 0.9310                | [-0.228; 0.246] |
| Sample Size                         |                       | 0.0491   | 0.1362 | 0.3602  | 0.7620                | [-0.218; 0.316] |
| <b>Systemic lupus erythematosus</b> | 55.16                 |          |        |         |                       |                 |
| Year                                |                       | 0.0499   | 0.0368 | 1.3565  | 0.2720                | [-0.022; 0.122] |
| Study design                        |                       | 0.3276   | 0.4652 | 0.7043  | 0.4980                | [-0.584; 1.239] |
| Region                              |                       | 0.4796*  | 0.1867 | 2.5685  | 0.0450                | [0.114; 0.846]  |
| Sample Size                         |                       | 0.1173   | 0.1233 | 0.9517  | 0.3920                | [-0.124; 0.359] |
| <b>Transplantation</b>              | 0.00                  |          |        |         |                       |                 |
| Year                                |                       | 0.0924   | 0.0803 | 1.1498  | 0.3260                | [-0.065; 0.250] |
| Study design                        |                       | 1.2534   | 1.6464 | 0.7613  | 0.4670                | [-1.973; 4.480] |
| Region                              |                       | -0.0007  | 0.5025 | -0.0014 | 0.9980                | [-0.986; 0.984] |
| Sample Size                         |                       | 0.0686   | 0.4462 | 0.1537  | 0.8930                | [-0.806; 0.943] |
